# Supplementary material
Source: HighWire-hosted journal article supplement (https://jnm.snmjournals.org/highwire/filestream/95301/field_highwire_adjunct_files/0/201889_Supplemental_Data.pdf)

**SUPPLEMENTAL TABLE 1:**

Demographics of the development group. WB= Whole Body; HN = Head and Neck; SCID = Severe Combined Immunodeficiency; FTT= Failure to thrive; CGD = Chronic Granulomatous Disease. PTLD = Post Transplant Lymphoproliferative Disease.

| Indication      | Acquisition | Gender | Age (years) | Result of FDG PET                                                 |
|-----------------|-------------|--------|-------------|-------------------------------------------------------------------|
| Fever           | Brain       | F      | 9           | Non-specific findings HN regions. No other focus of infection     |
| Polyalgias      | Brain       | F      | 17          | Normal study                                                      |
| Fever           | Brain       | M      | 3           | Non-specific findings HN regions. No other focus of infection     |
| Lymphoma        | HN          | M      | 5           | Burkitt lymphoma bones, kidneys, upper abdomen                    |
| Lymphoma        | HN          | F      | 12          | B cell lymphoma of bone                                           |
| Lymphoma        | HN          | F      | 10          | T cell lymphoblastic lymphoma stage IV                            |
| Neck Pain       | Brain       | M      | 16          | Normal study                                                      |
| Infection       | Brain       | M      | 18          | Prior treated LAL. Non-specific findings HN regions.              |
| Lymphadenopathy | HN          | M      | 6           | HN infection/inflammation                                         |
| Polyalgias      | Brain       | F      | 10          | Normal study                                                      |
| Lymphoma        | HN          | M      | 3           | T cell lymphoblastic lymphoma stage IV                            |
| Neoplasm        | HN          | M      | 17          | Eosinophilic granuloma T11                                        |
| Lymphadenopathy | HN          | M      | 11          | Cervical Rosai Dorfman                                            |
| Lymphadenopathy | HN          | F      | 8           | Normal study                                                      |
| Lymphoma        | HN          | M      | 16          | Hodgkin Lymphoma stage II                                         |
| Lymphoma        | HN          | M      | 9           | Cervical Burkitt                                                  |
| Lymphadenopathy | HN          | M      | 6           | Non-specific findings HN regions. Reactive lymph nodes            |
| Lymphadenopathy | HN          | F      | 4           | Non-specific findings HN regions. Reactive lymph nodes. Pneumonia |
| Lymphadenopathy | HN          | F      | 10          | Normal study                                                      |
| Lymphoma        | HN          | F      | 16          | Hodgkin Lymphoma stage IIB                                        |
| PTLD            | HN          | F      | 14          | Renal transplant. No PTLD                                         |
| PTLD            | HN          | M      | 7           | Cardiac transplant. No PTLD                                       |
| Infection       | HN          | F      | 10          | Normal study                                                      |
| Neoplasm        | HN          | M      | 18          | Langherans cell histiocytosis                                     |
| FTT             | WB          | F      | 18          | Non specific findings HN regions.                                 |
| Lymphadenopathy | HN          | F      | 10          | Normal study                                                      |
| Lymphadenopathy | HN          | M      | 14          | Non-specific findings HN regions. Reactive lymph nodes            |
| Lymphadenopathy | HN          | F      | 7           | Non-specific findings HN regions. Reactive lymph nodes            |
| PTLD            | HN          | M      | 17          | Renal transplant. Abdominal PTLD                                  |
| Fever           | WB          | M      | 2           | No infection                                                      |
| Polyalgias      | HN          | F      | 10          | Normal study                                                      |
| Polychondritis  | HN          | M      | 2           | Normal study                                                      |
| Lymphoma        | HN          | F      | 14          | Hodgkin Lymphoma stage IV                                         |

|                |       |   |     |                                                                   |
|----------------|-------|---|-----|-------------------------------------------------------------------|
| Hypertension   | Brain | F | 16  | Normal study                                                      |
| Lymphoma       | HN    | M | 14  | Hodgkin Lymphoma stage IIA                                        |
| Sarcoidosis    | Brain | M | 9   | Non evidence of sarcoidosis                                       |
| Fever          | WB    | M | 3   | Non-specific findings HN regions. Reactive lymph nodes. Pneumonia |
| Neoplasm       | WB    | F | 9   | Osteosarcoma                                                      |
| FTT            | WB    | F | 9   | Non-specific findings HN regions. Reactive lymph nodes            |
| Neoplasm       | WB    | F | 9   | Osteosarcoma                                                      |
| Xerostomia     | WB    | M | 10  | Normal study                                                      |
| Infection      | WB    | M | 16  | Sternal osteomyelitis                                             |
| Lymphnodes     | WB    | F | 2   | Benign reactional lymphoproliferation                             |
| Neoplasm       | HN    | F | 12  | Ewing sarcoma                                                     |
| PTLD           | HN    | M | 6   | Cardiac transplant. No PTLT                                       |
| Neoplasm       | WB    | F | 2   | Neuroblastoma                                                     |
| Abdominal pain | WB    | M | 8   | Mesenteric adenitis                                               |
| Fever          | WB    | F | 8   | Non specific findings HN regions                                  |
| Neoplasm       | WB    | M | 12  | Ewing sarcoma                                                     |
| Infection      | WB    | M | 10  | Cervical adenitis                                                 |
| Neoplasm       | WB    | M | 4   | Neuroblastoma                                                     |
| MGC            | WB    | M | 0,5 | Pneumonia                                                         |
| Lymphoma       | HN    | F | 15  | Grey zone lymphoma                                                |
| Fever          | HN    | F | 16  | Normal study                                                      |
| Lymphoma       | HN    | M | 11  | Hodgkin Lymphoma stage IIIB off treatment                         |
| Lymphoma       | HN    | F | 4   | Burkitt lymphoma                                                  |
| Neoplasm       | WB    | F | 1   | Mediastinal mass. No evidence of neoplasm. Likely post infection  |
| SCID           | WB    | M | 1   | B cell lymphoma                                                   |
| Lymphoma       | WB    | F | 3   | Anaplastic lymphoma                                               |

**SUPPLEMENTAL TABLE 2:**

Demographics of the validation group. WB= Whole Body; HN = Head and Neck; ITP:

Idiopathic Thrombocytopenic Purpura; CGD = Chronic Granulomatous Disease.

| Indication          | Acquisition | Gender | Age (years) | Result of FDG PET                                      |
|---------------------|-------------|--------|-------------|--------------------------------------------------------|
| Lung inflammation   | Brain       | F      | 13          | Normal study                                           |
| Cutaneous anomalies | Brain       | F      | 16          | Normal study                                           |
| Crohn               | Brain       | F      | 14          | Duodenal ulceration                                    |
| Coeliac disease     | Brain       | M      | 15          | Small bowel inflammation                               |
| Neoplasm            | HN          | F      | 15          | Nasopharyngeal Sarcoma                                 |
| Lymphoma            | HN          | F      | 4           | B cell lymphoma                                        |
| Neoplasm            | HN          | F      | 13          | Posterior mediastinal mass / schwannoma                |
| PTI                 | WB          | F      | 12          | Non specific findings HN regions                       |
| Fever               | WB          | F      | 2           | Pneumonia                                              |
| Fever               | WB          | M      | 4           | Non specific findings HN regions                       |
| Lymphadenopathy     | HN          | M      | 15          | Benign reactional lymphoproliferation                  |
| Neoplasm            | HN          | F      | 13          | Inactive mandibular mass / aneurysmal bone cyst        |
| Lymphoma            | HN          | F      | 12          | Hodkgin Lymphoma stage III A                           |
| Fever               | WB          | M      | 3           | Non-specific findings HN regions. Reactive lymph nodes |
| Lymphoma            | HN          | M      | 11          | B cell lymphoma stage I                                |
| Lymphoma            | WB          | F      | 11          | Hodkgin Lymphoma stage IV-B                            |
| Lymphadenopathy     | HN          | M      | 8           | Benign reactional lymphoproliferation                  |
| Fever               | HN          | F      | 18          | Small bowel inflammation and lung nodules / Loeffler   |
| Neoplasm            | WB          | F      | 14          | Rhabdomyosarcoma                                       |
| Polyalgias          | WB          | M      | 11          | Digital soft tissue inflammation                       |
| Lymphadenopathy     | WB          | F      | 3           | Normal study                                           |
| CGD                 | WB          | F      | 1           | Pneumonia                                              |
| Lymphadenopathy     | HN          | M      | 15          | Benign reactional lymphoproliferation / toxoplasmosis  |
| Neoplasm            | WB          | M      | 1           | Follow sarcoma. Normal study                           |
| Polychondritis      | HN          | M      | 16          | Normal study                                           |
| CGD                 | WB          | M      | 7           | Normal study                                           |
| Fever               | WB          | M      | 6           | Non-specific findings HN regions. Reactive lymph nodes |
| Fever               | WB          | M      | 2           | Non-specific findings HN regions. Reactive lymph nodes |
| Crohn               | Brain       | F      | 17          | Non-specific findings HN regions. lymph nodes          |

**SUPPLEMENTAL TABLE 3:**

**Optimal models for WBN**

Quadratique = quadratic ; linéaire = linear; cubique = cubic; composé = modified power law; de puissance = power law; logarithmique = logarithm

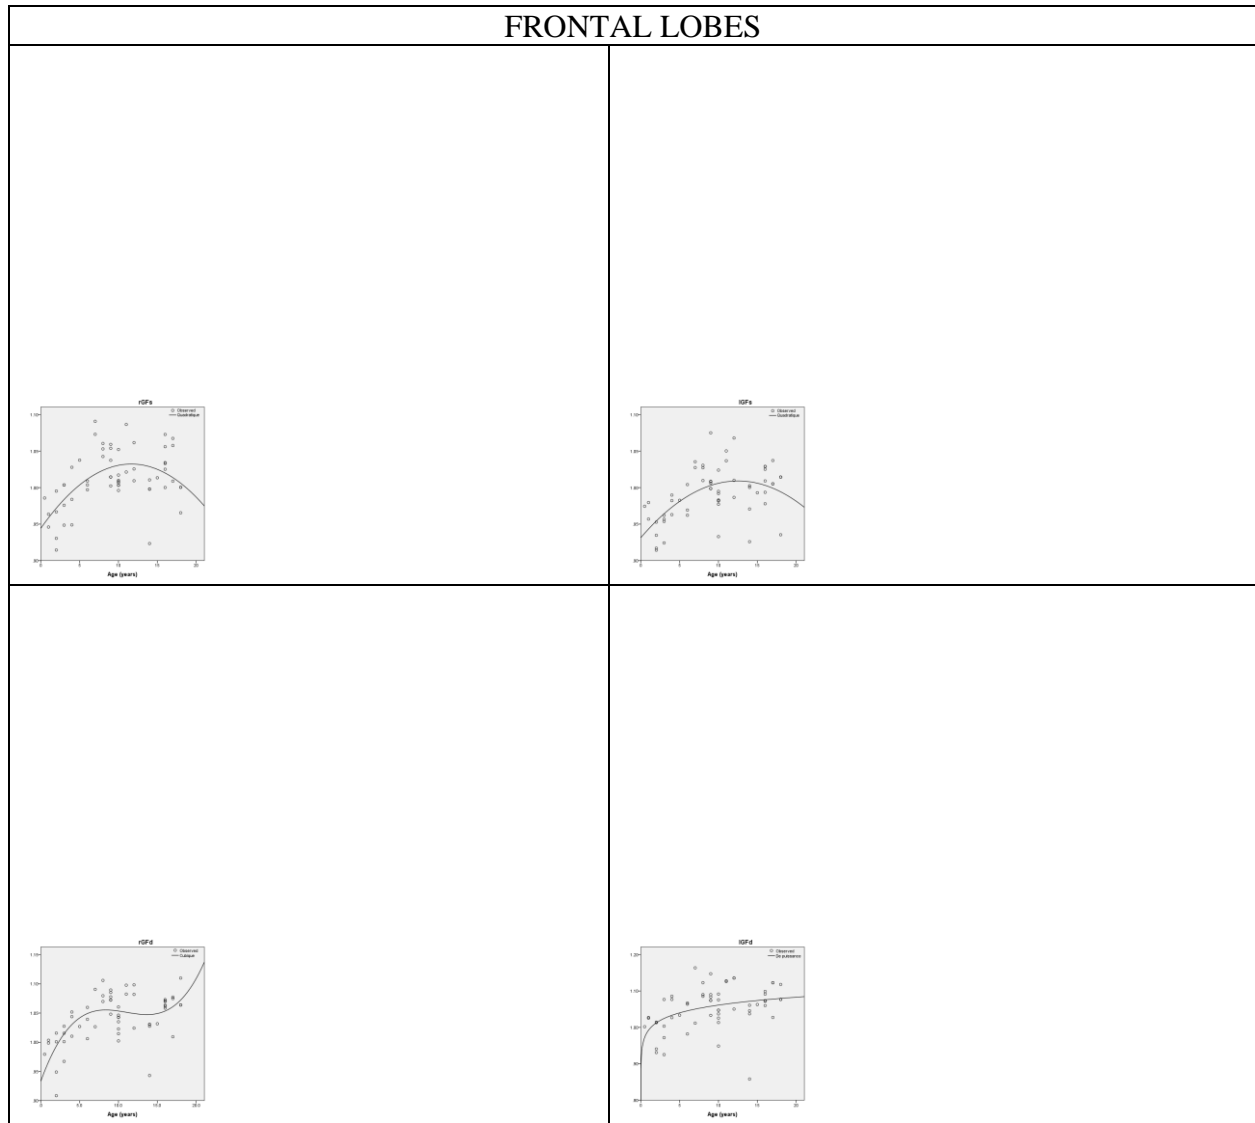

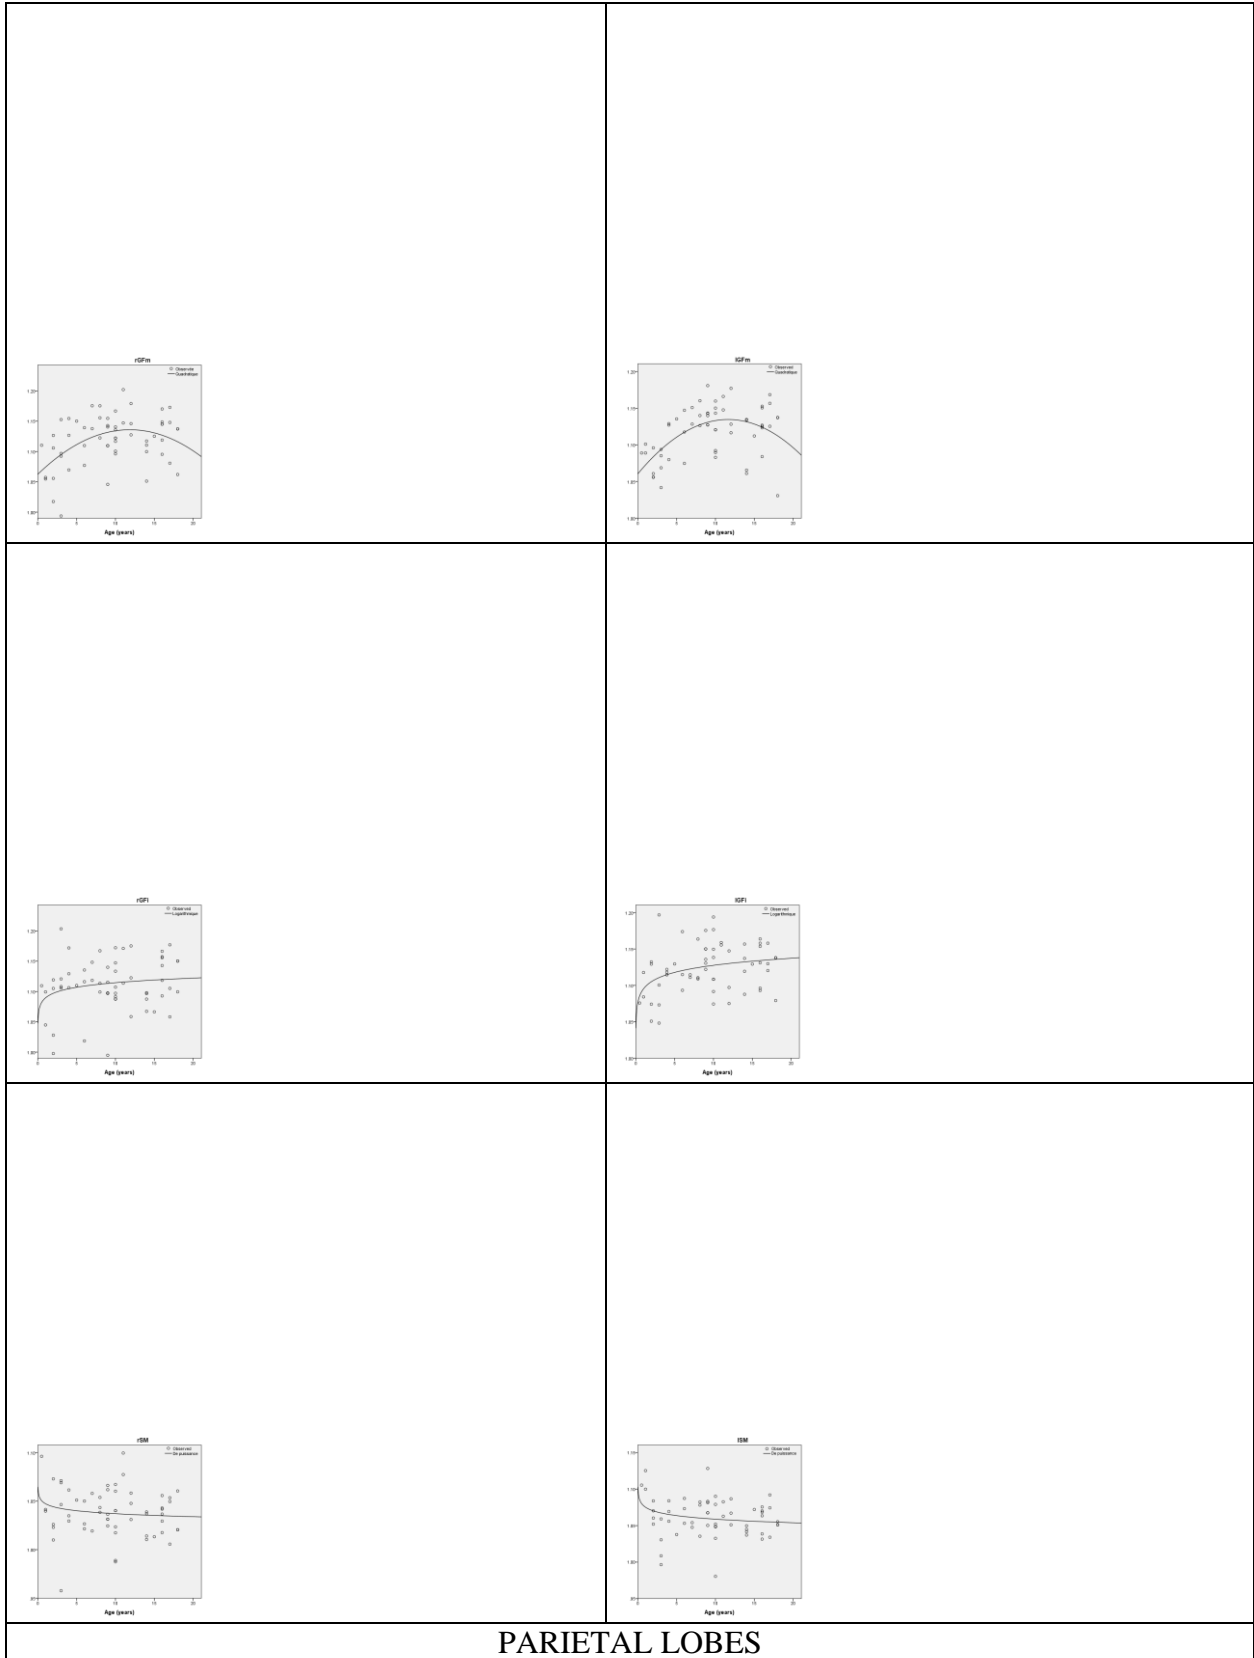

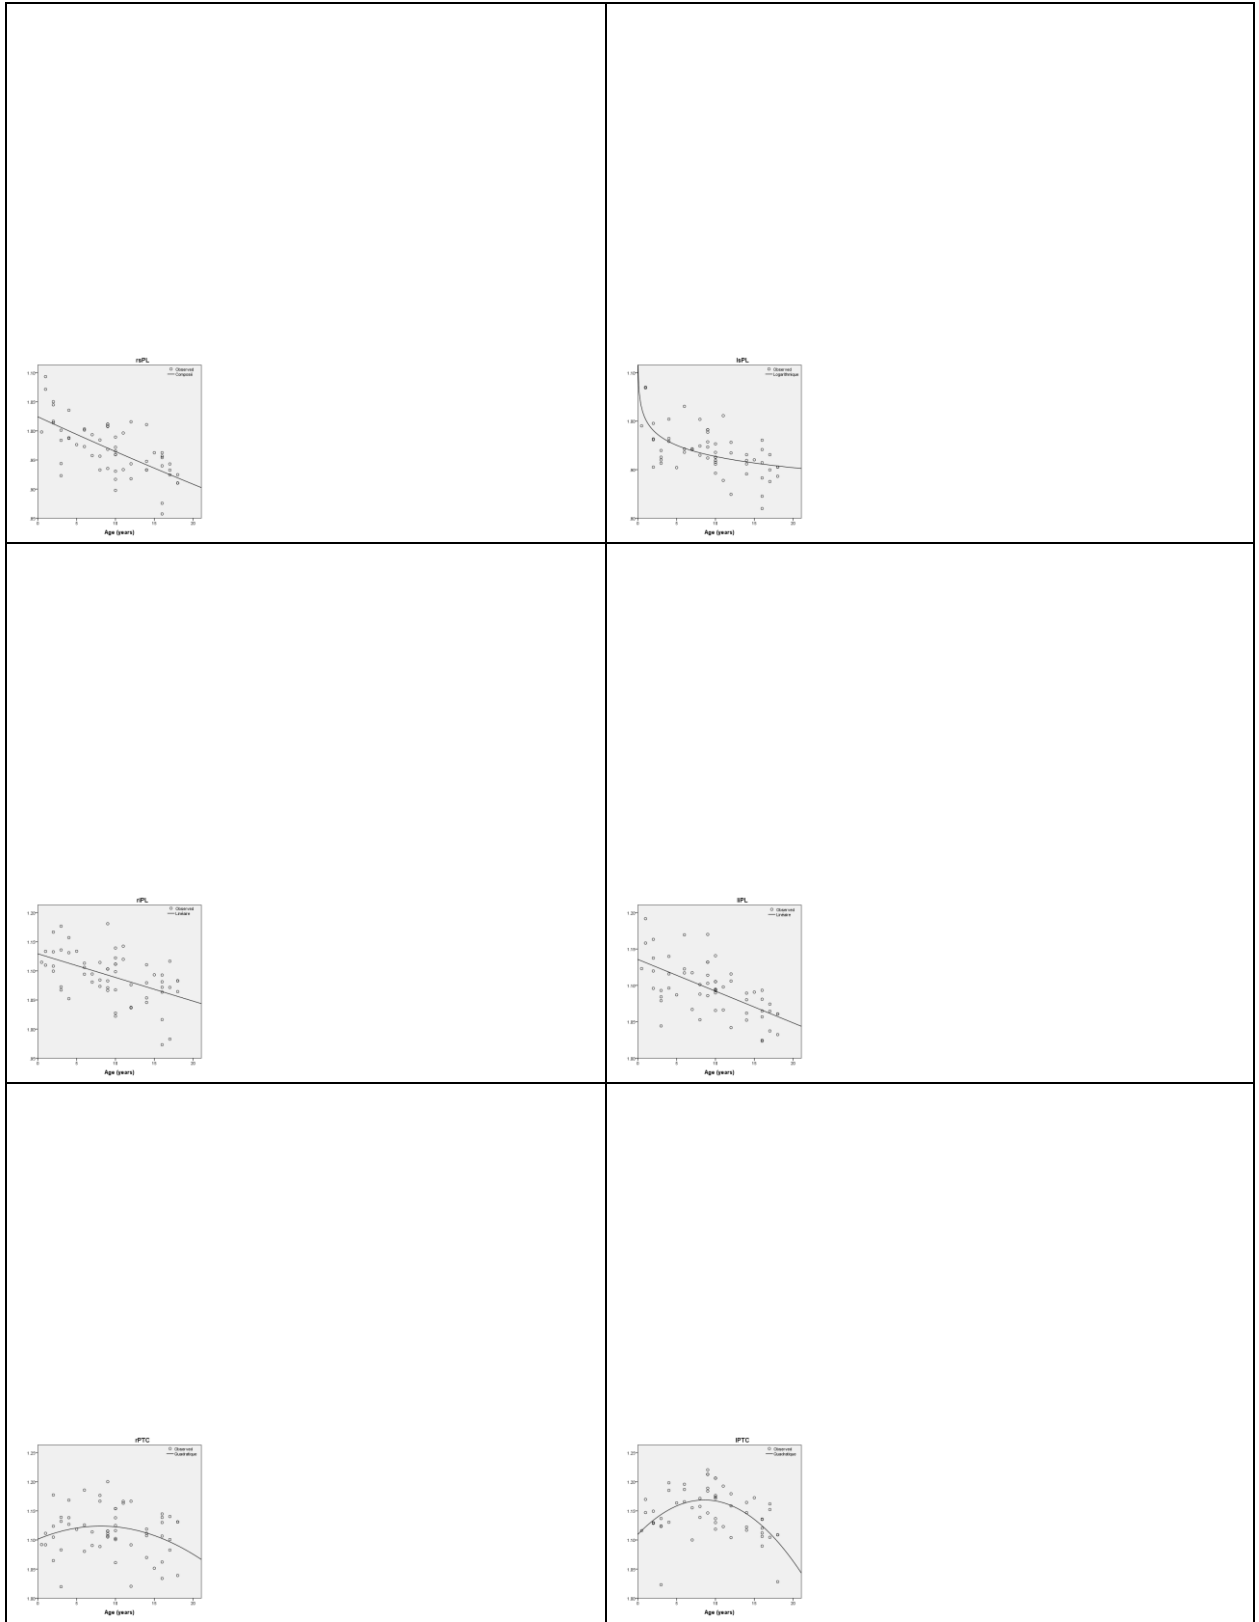

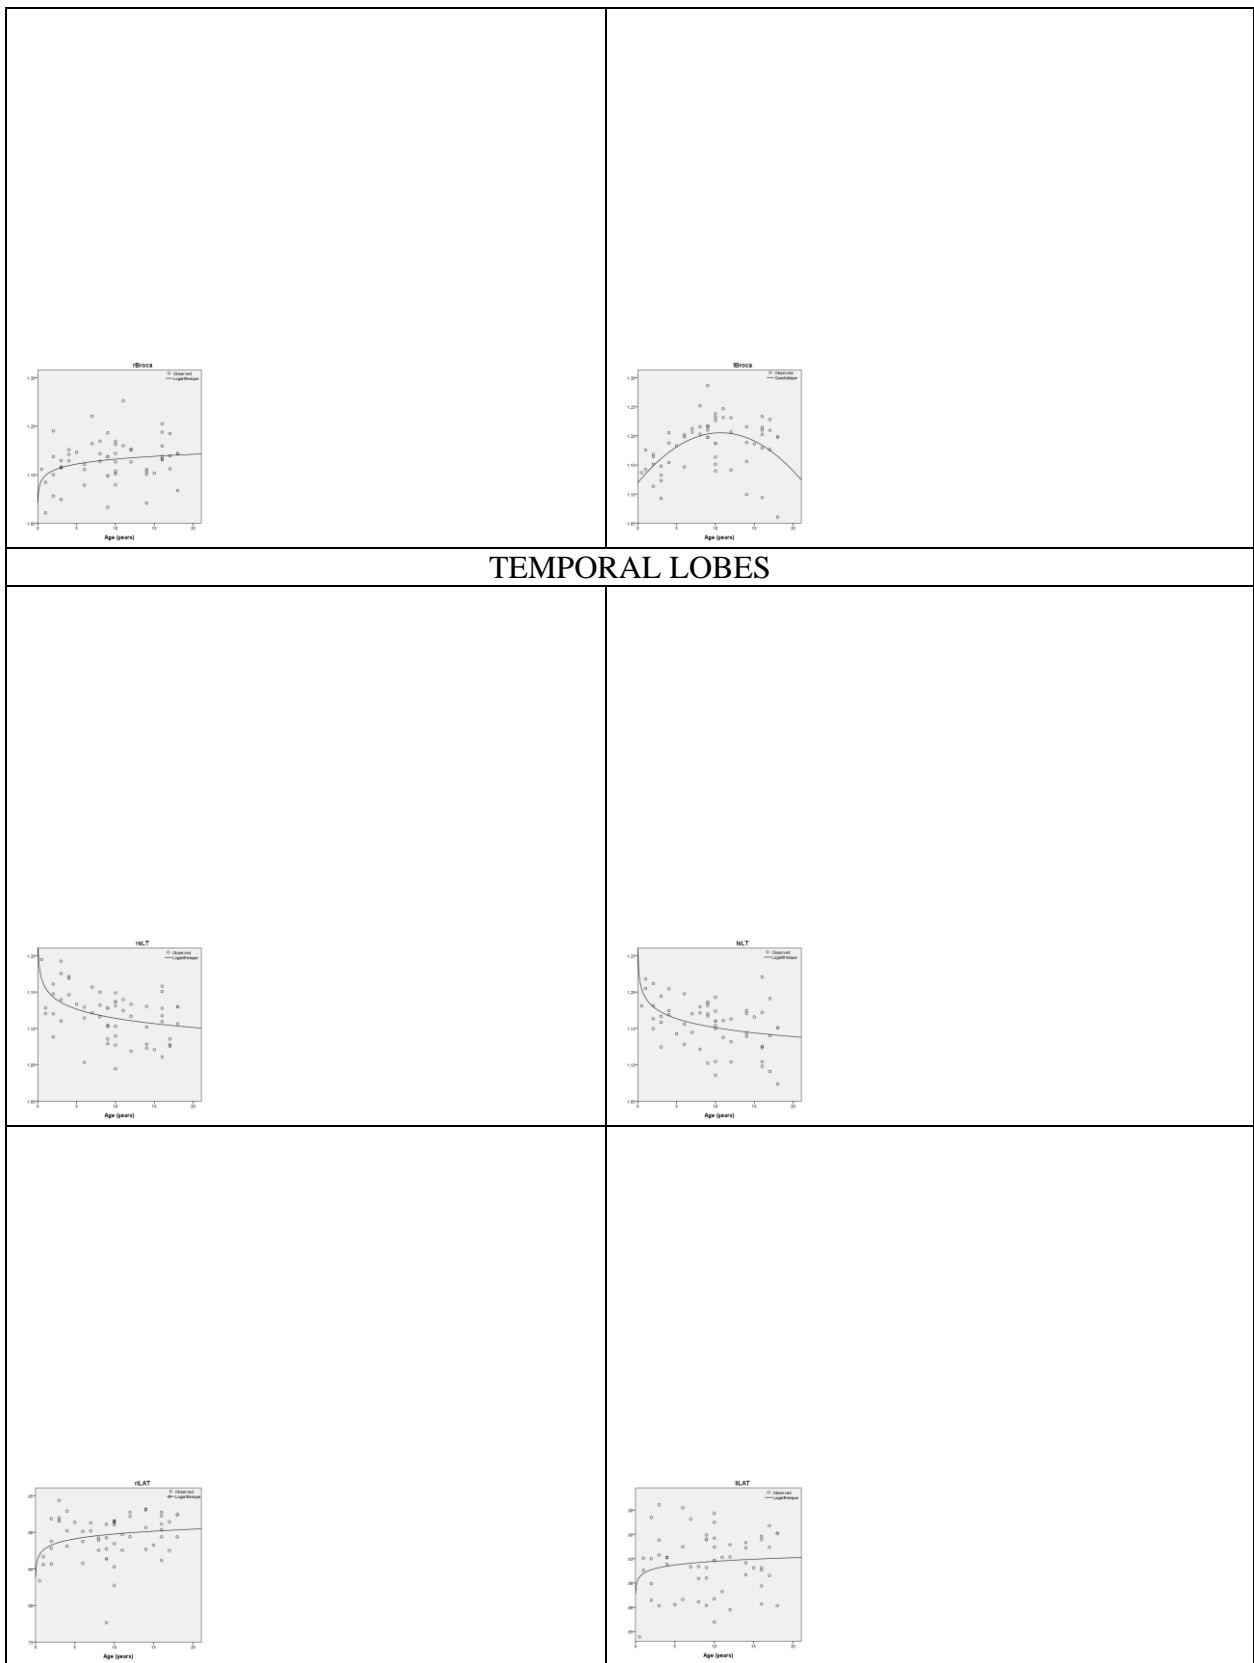

TEMPORAL LOBES

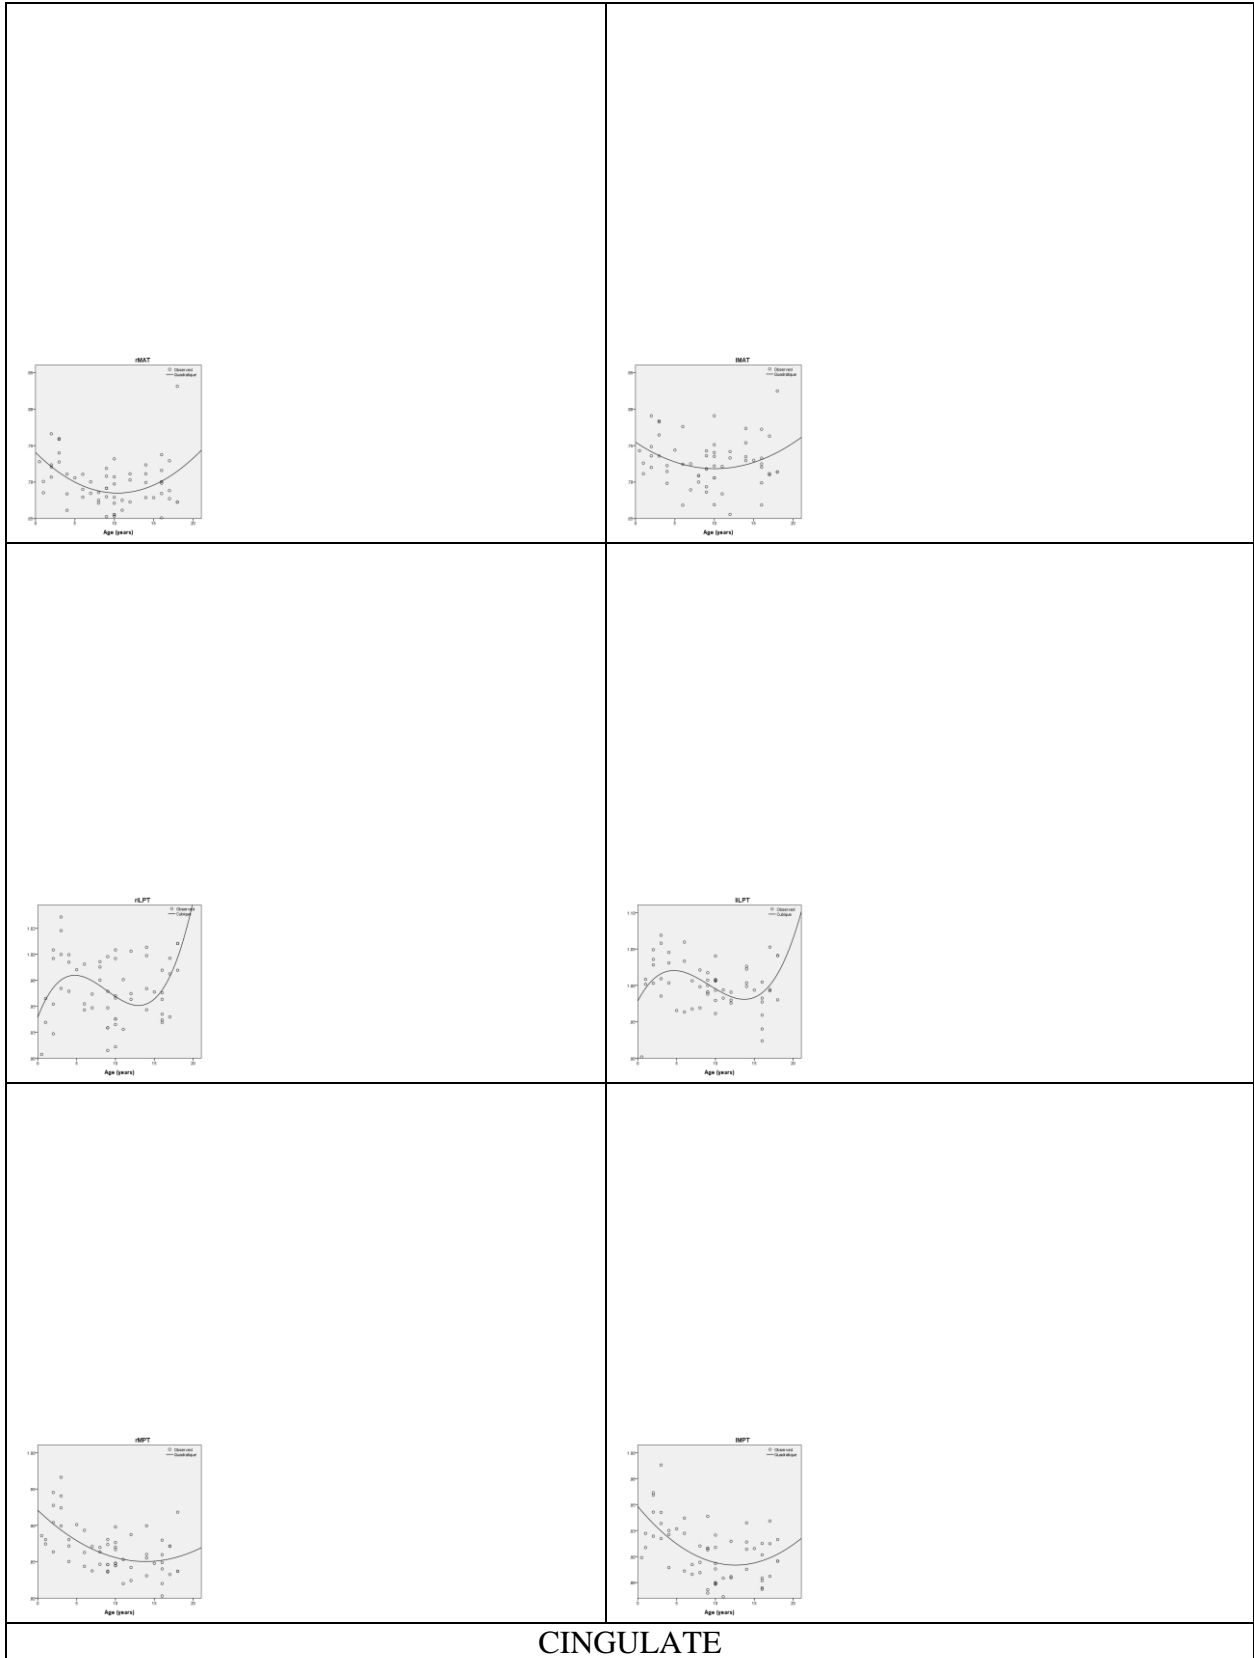



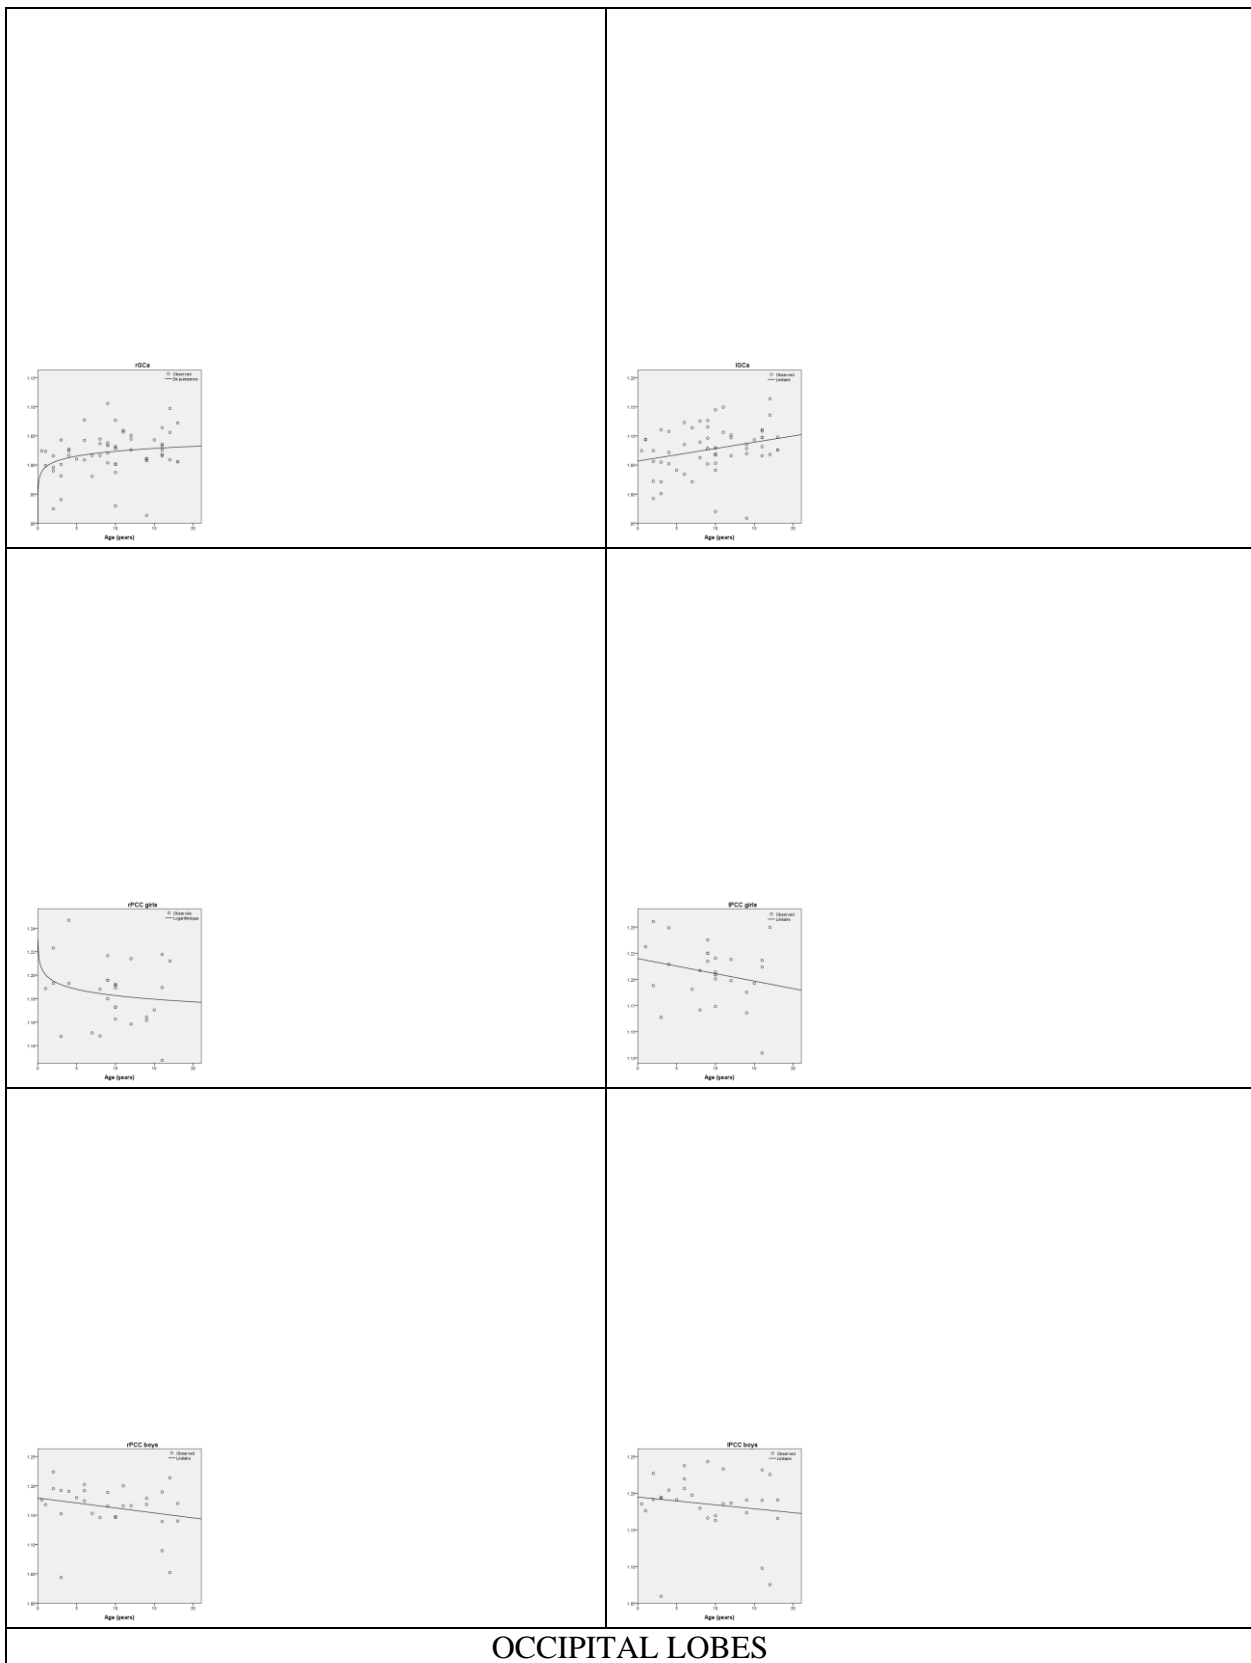

OCCIPITAL LOBES

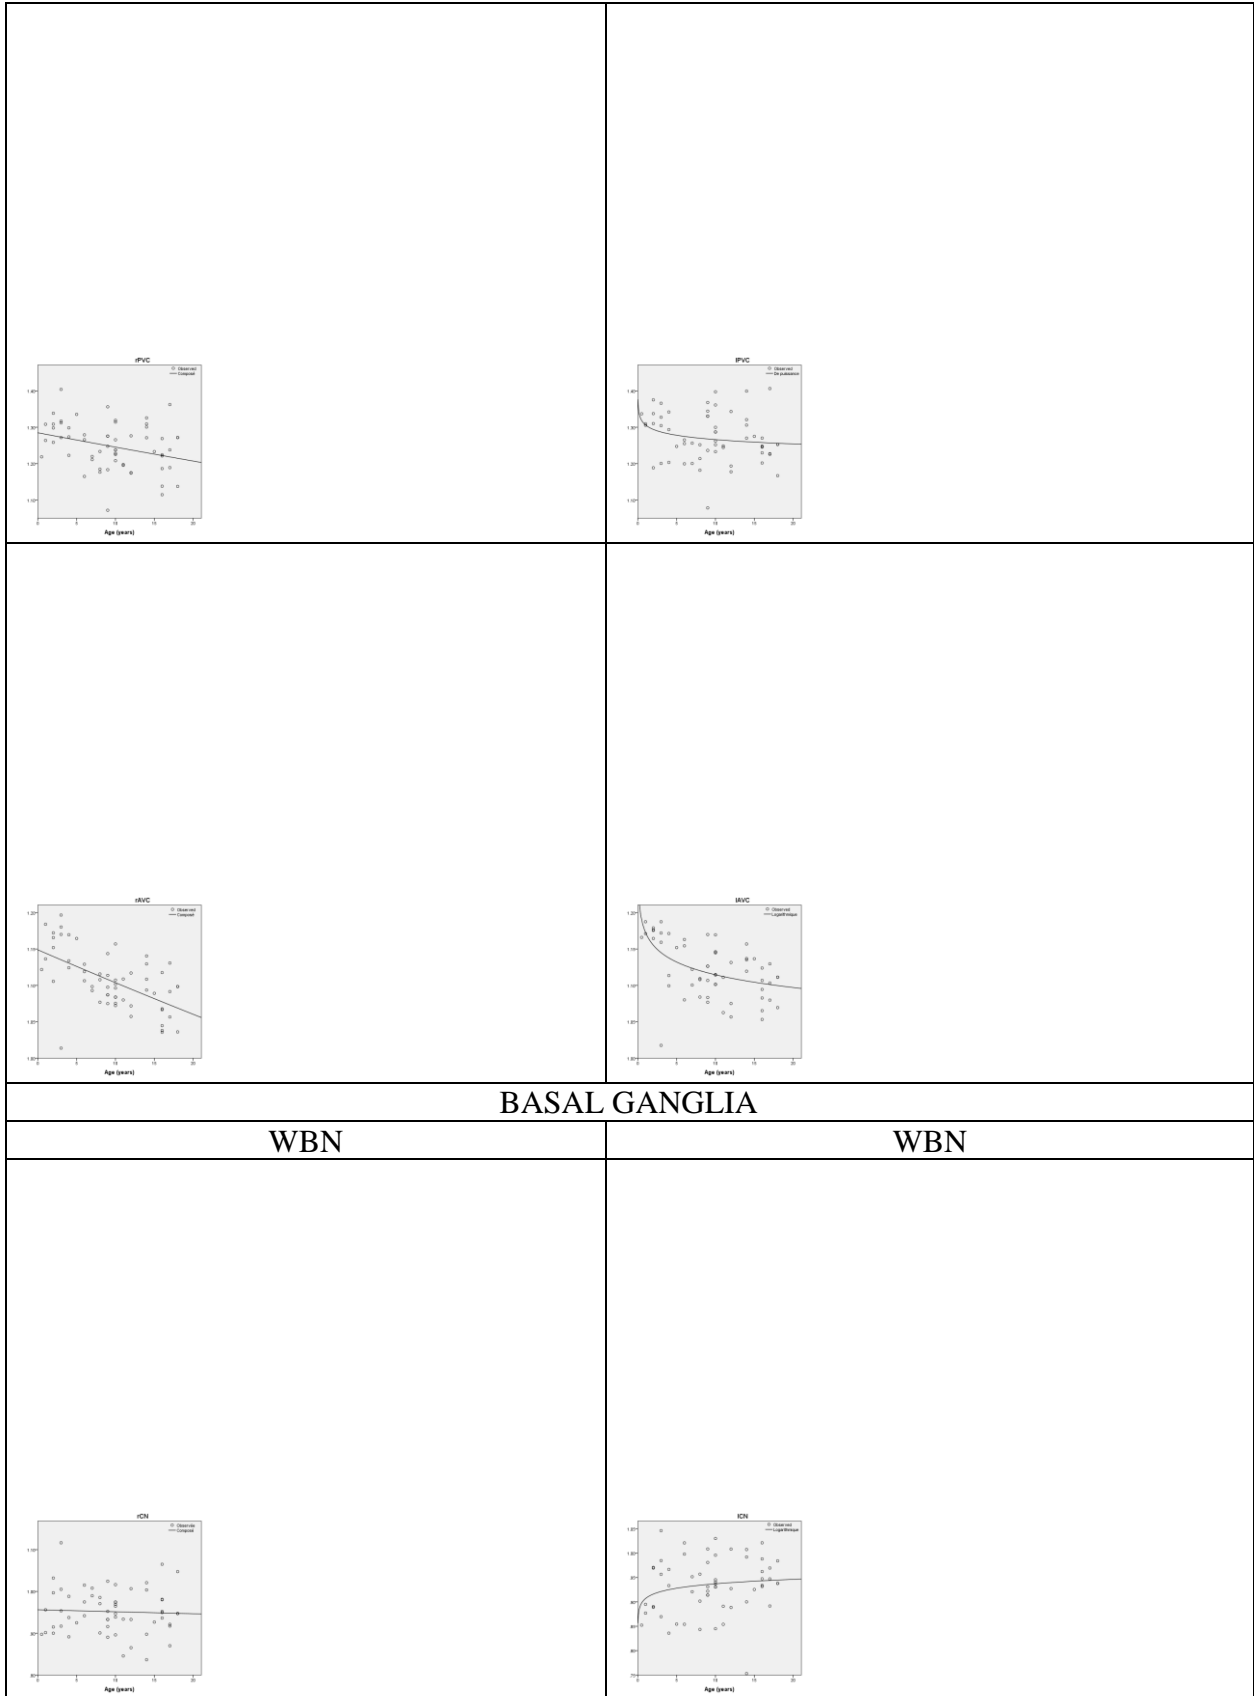

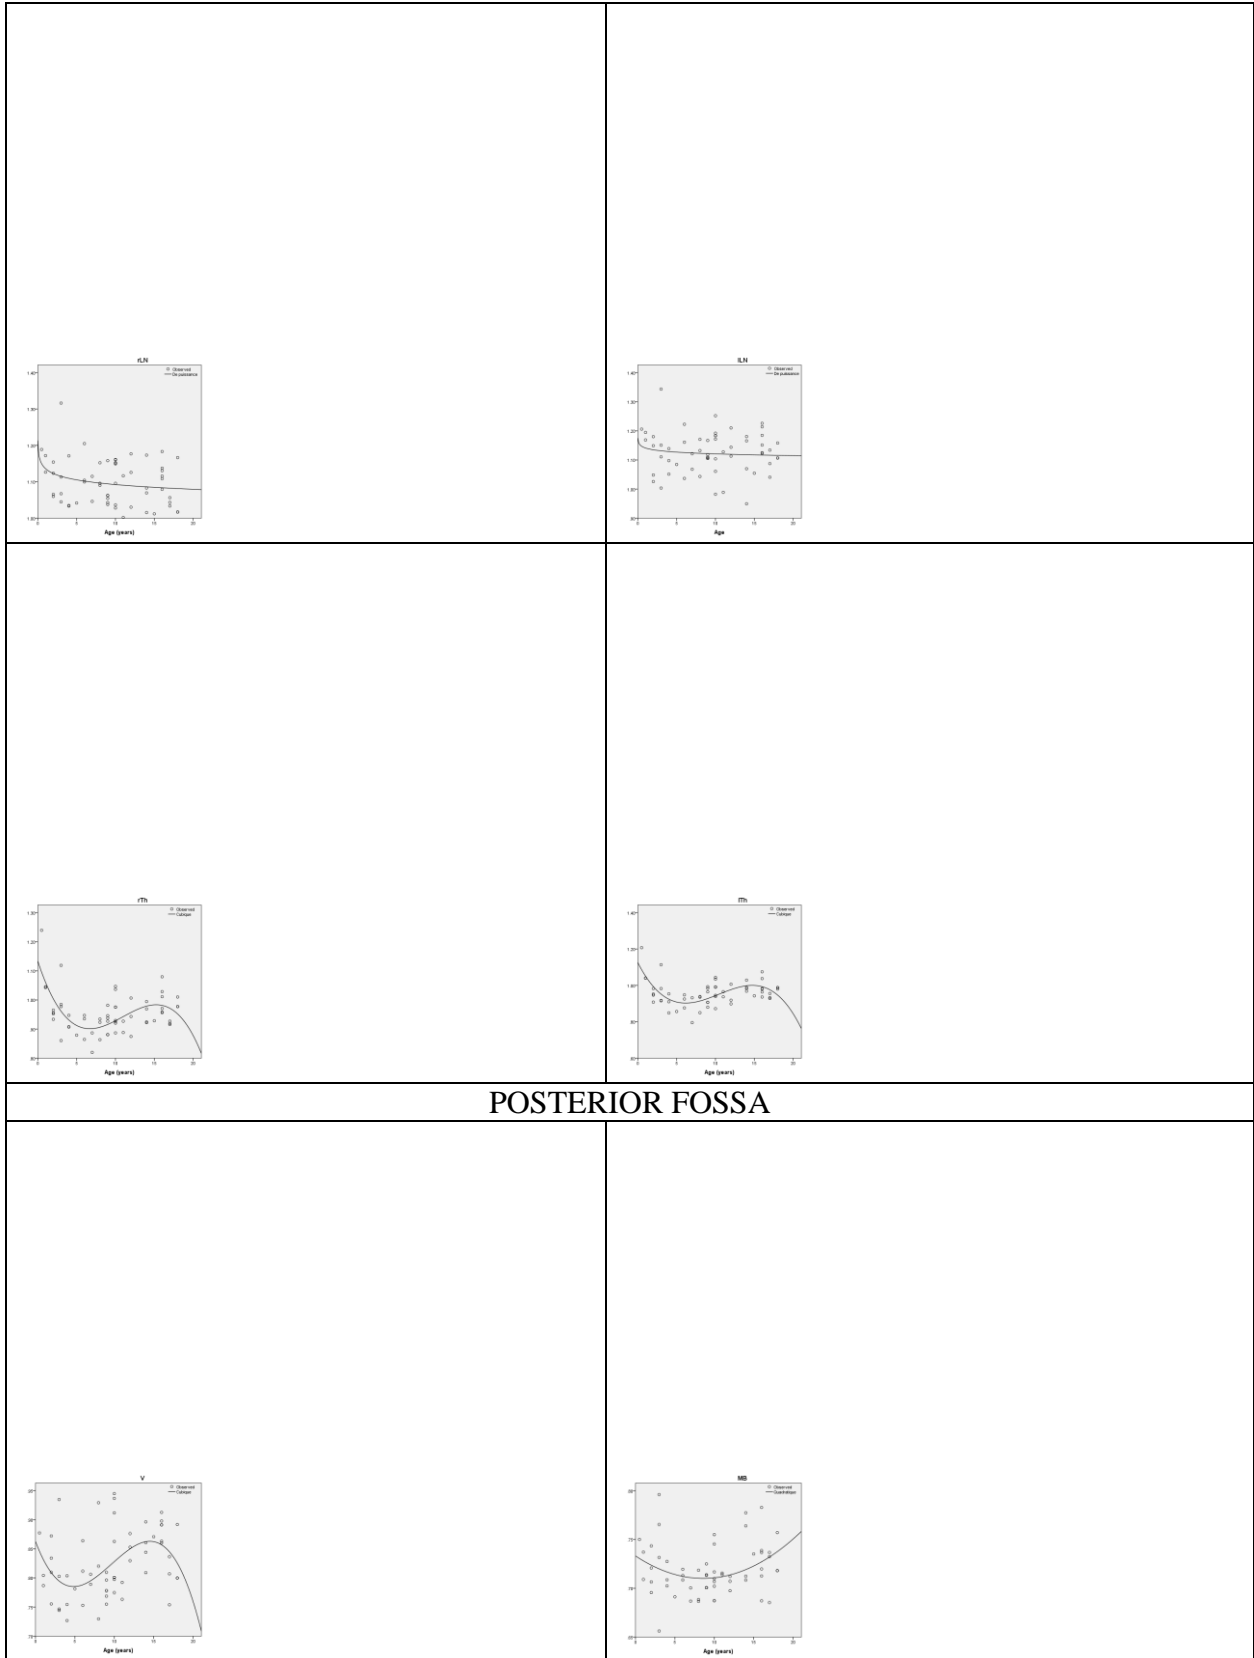

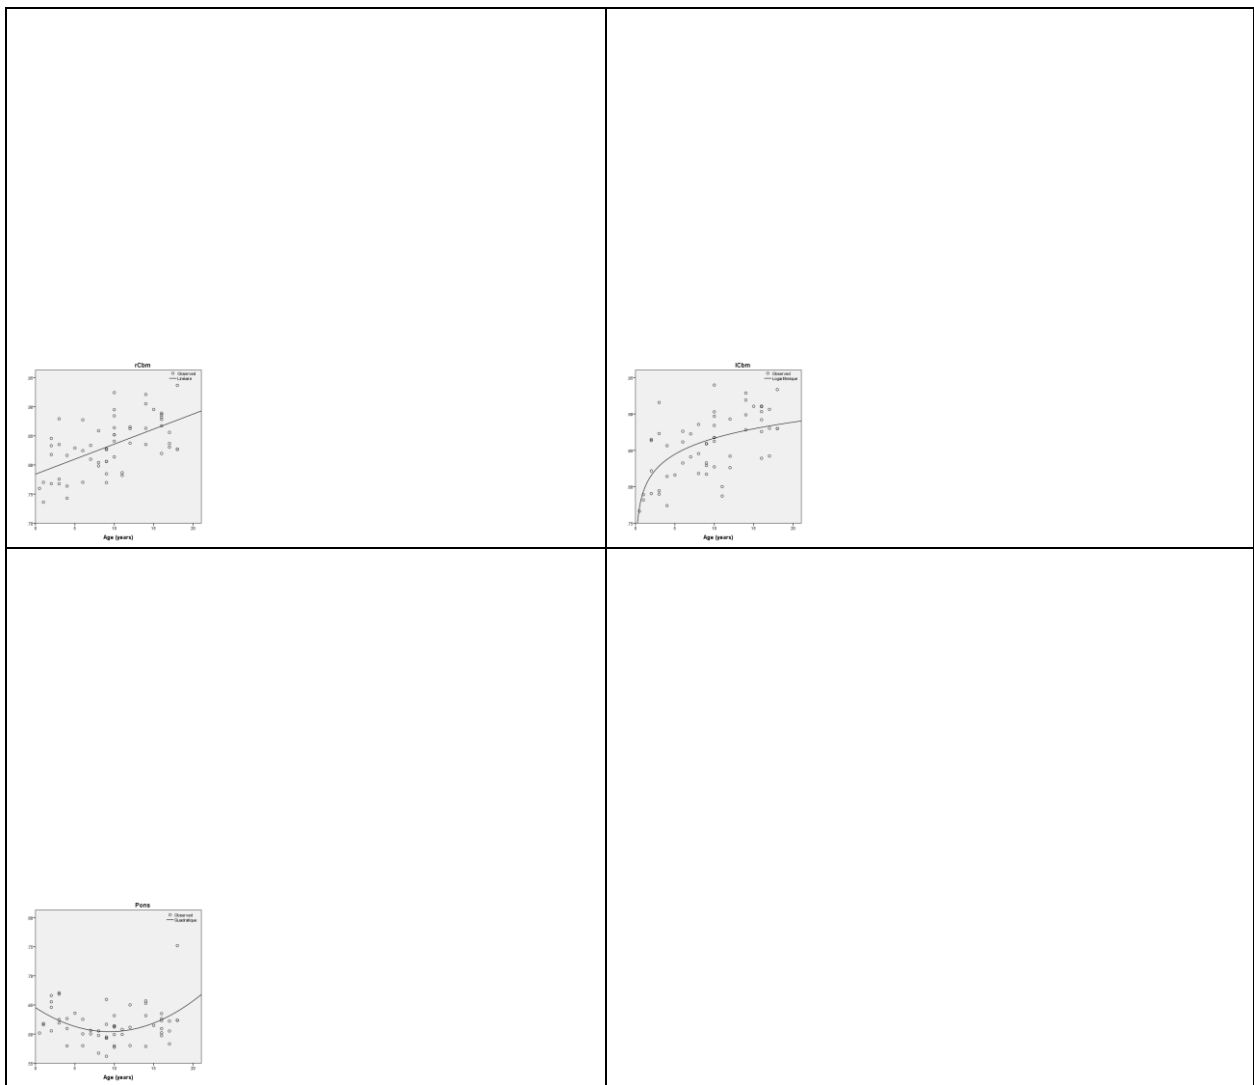

**SUPPLEMENTAL TABLE 4:**

**Optimal models for PN**

Quadratique = quadratic ; linéaire = linear; cubique = cubic; composé = modified power law; de puissance = power law; logarithmique = logarithm

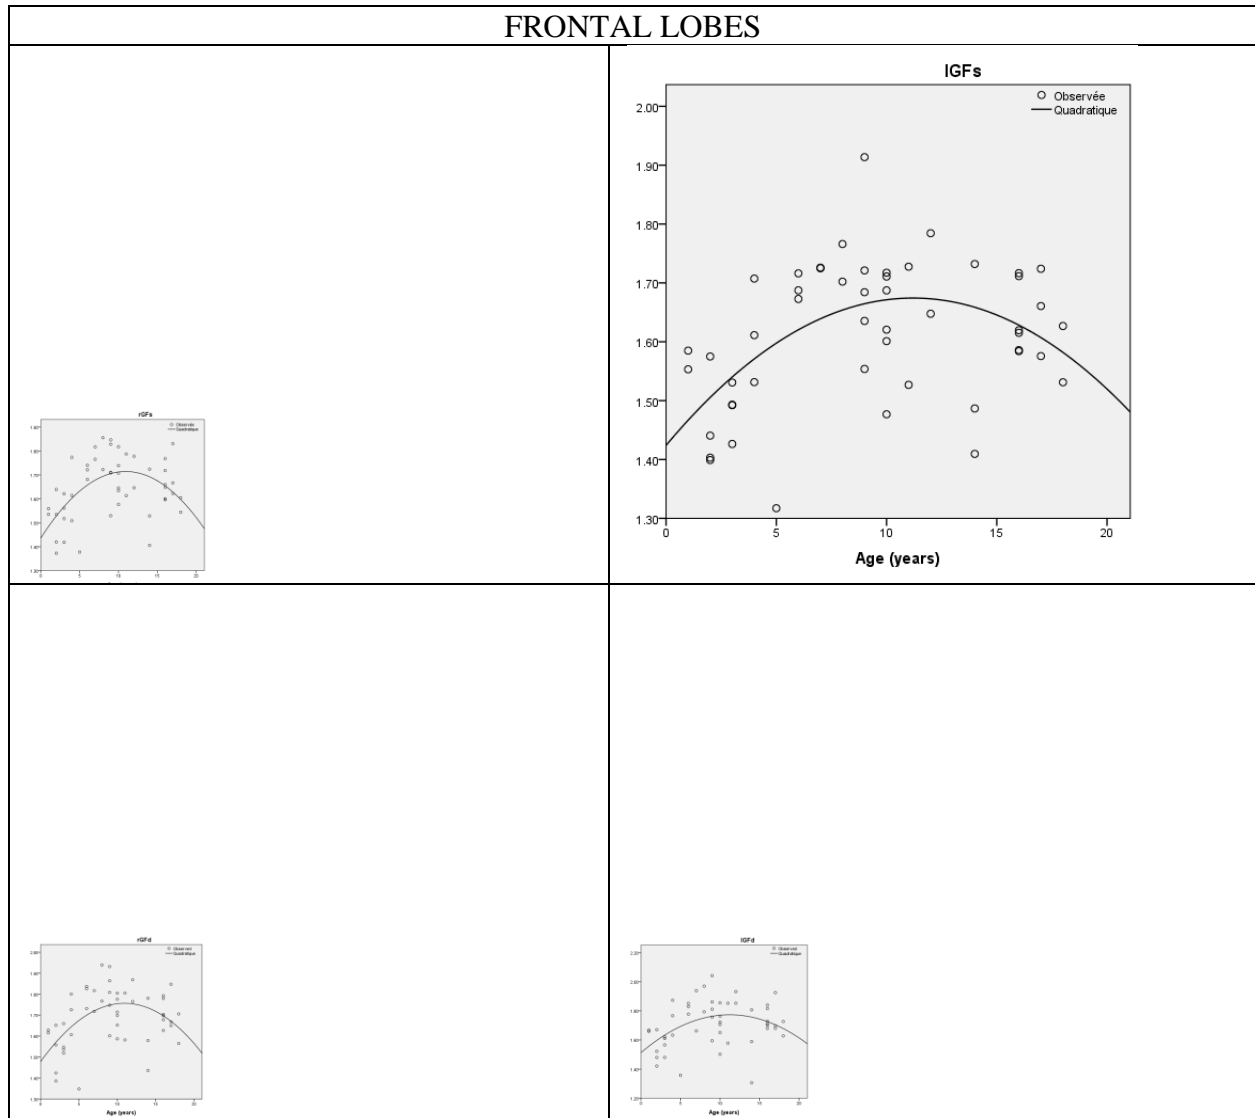

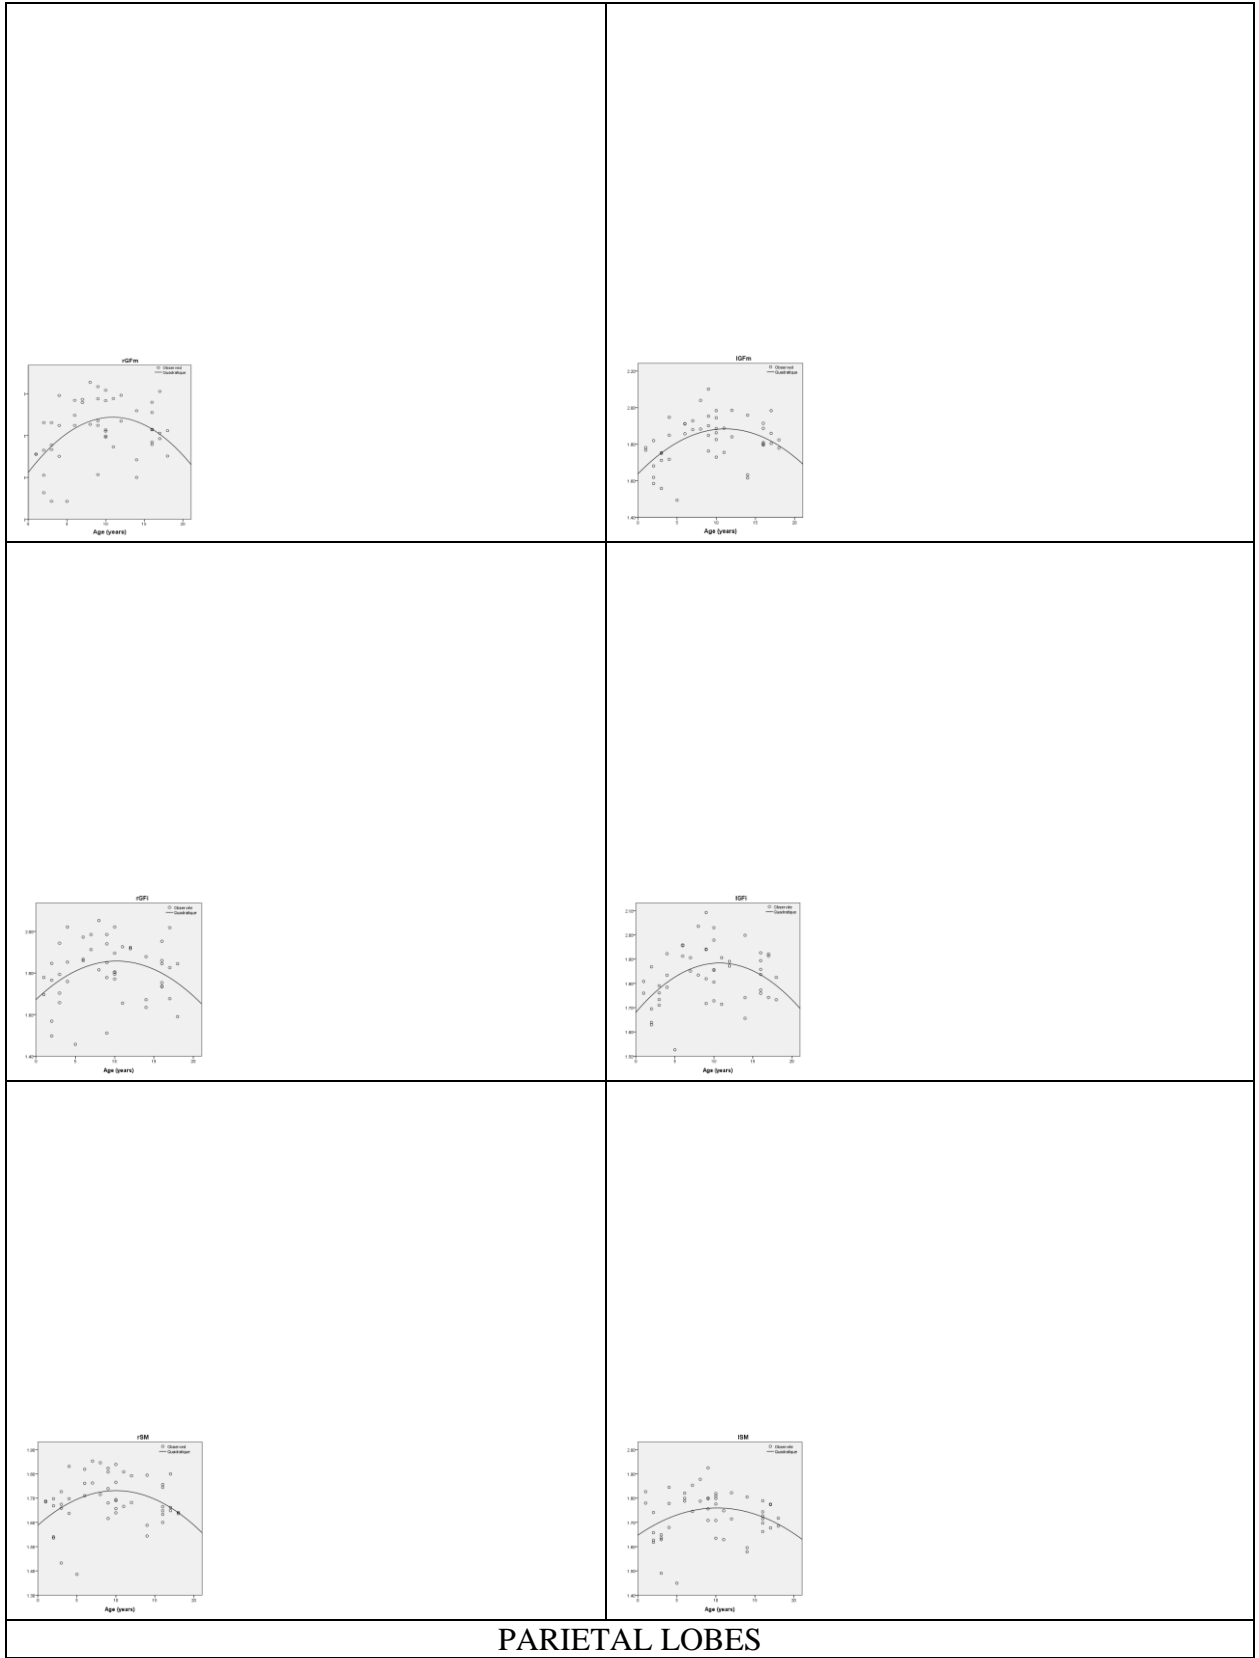

PARIETAL LOBES

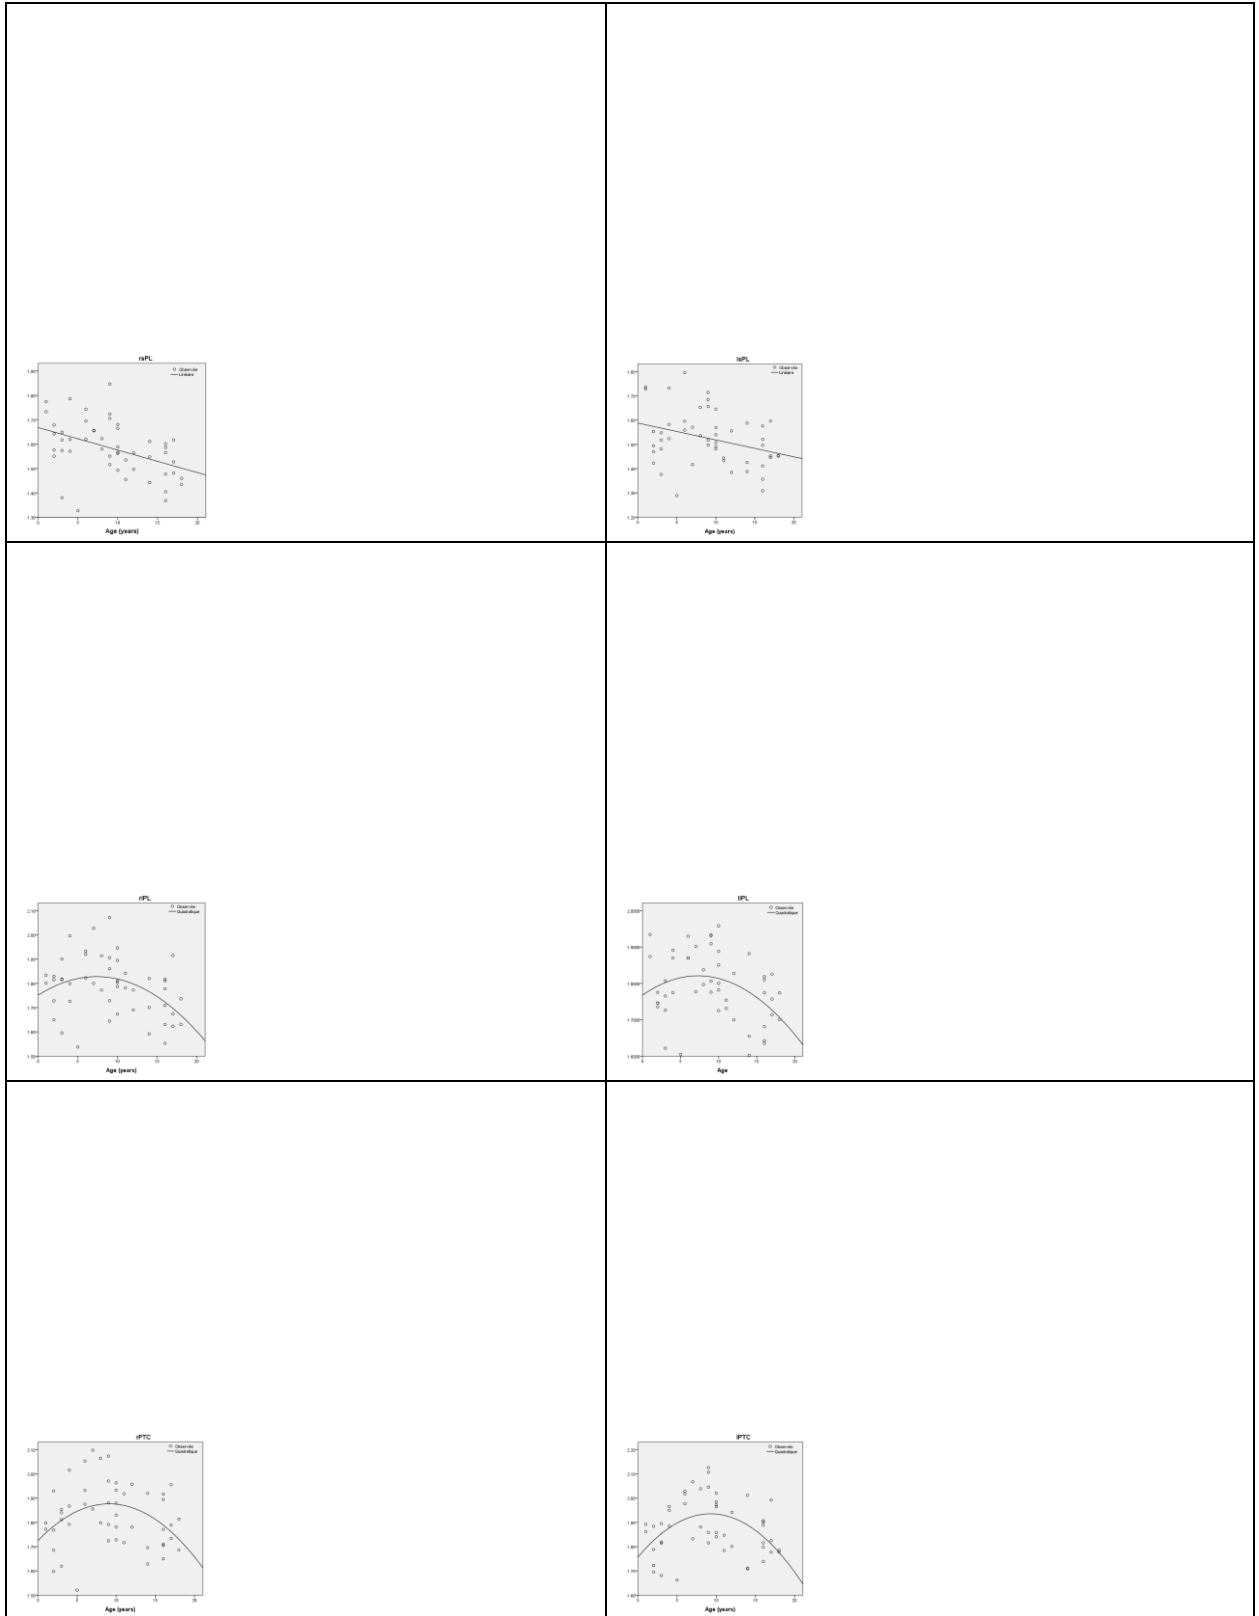

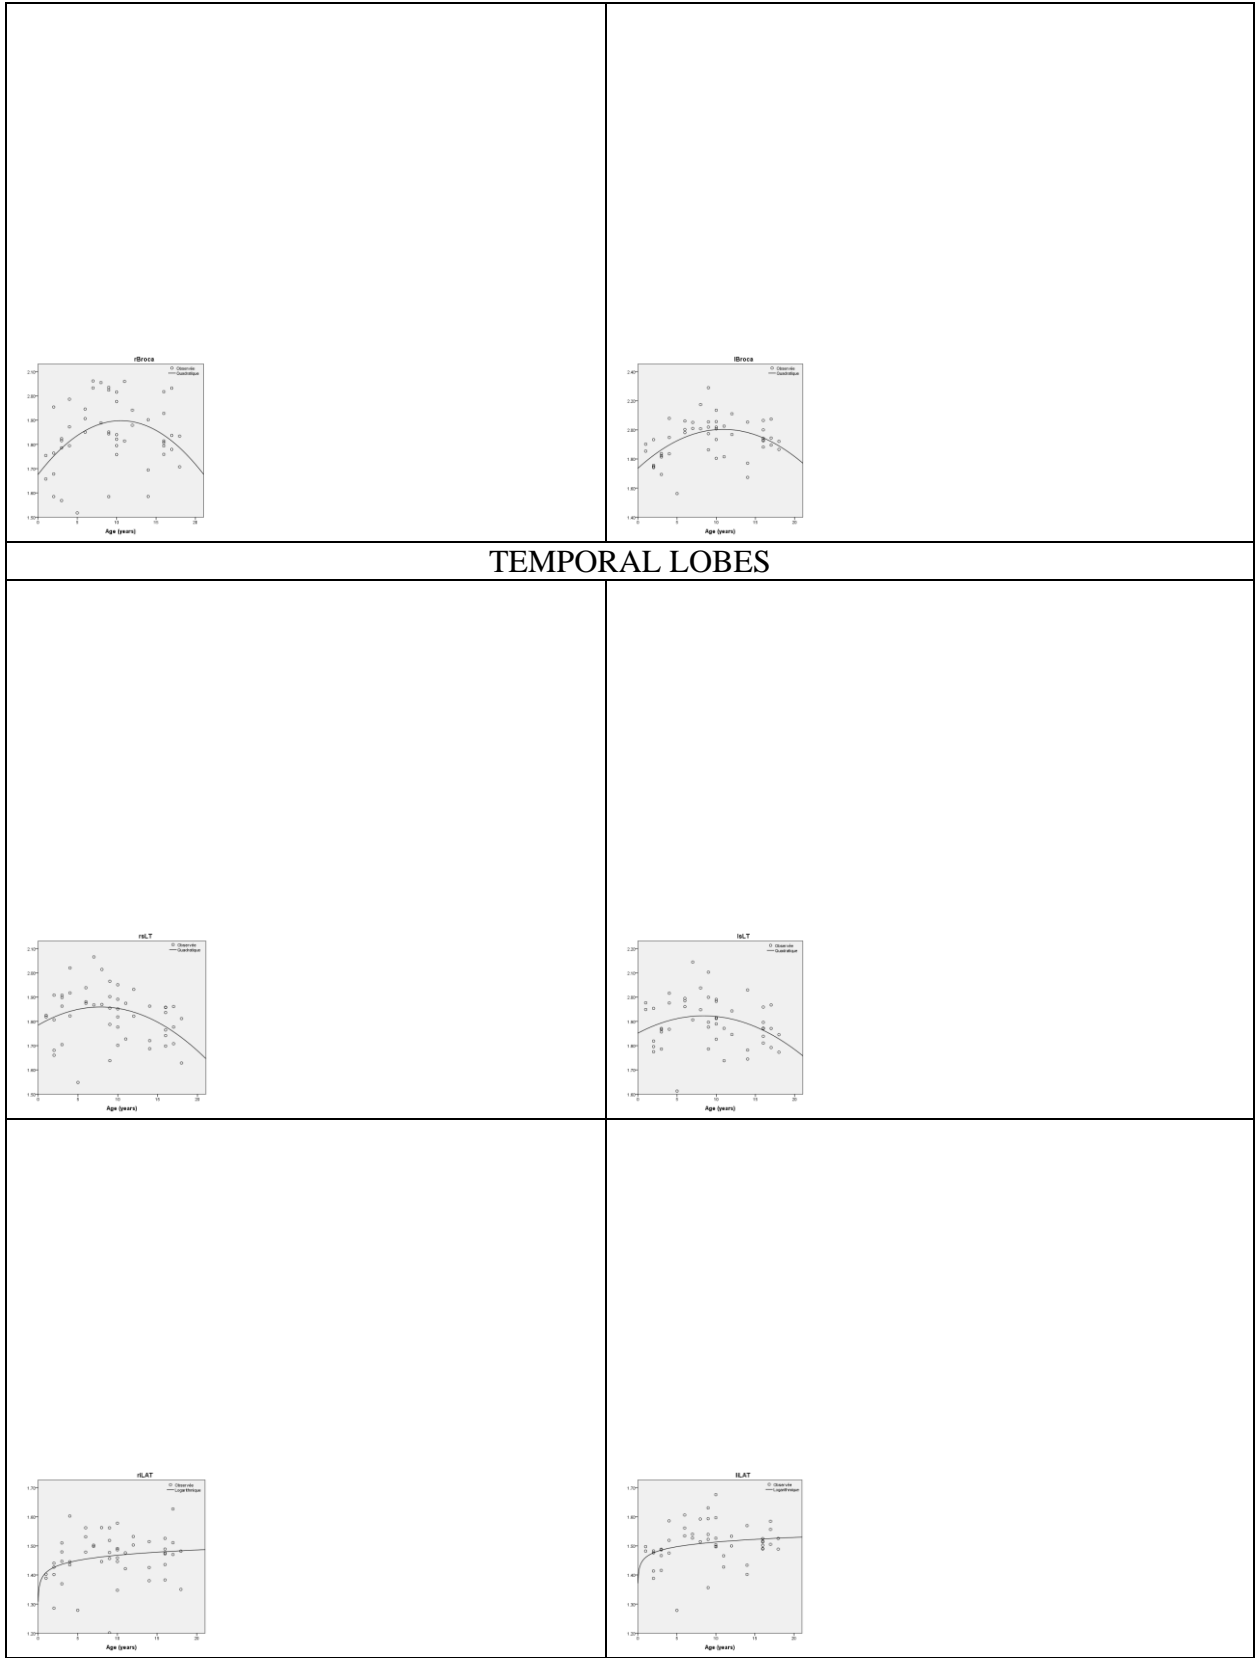

TEMPORAL LOBES



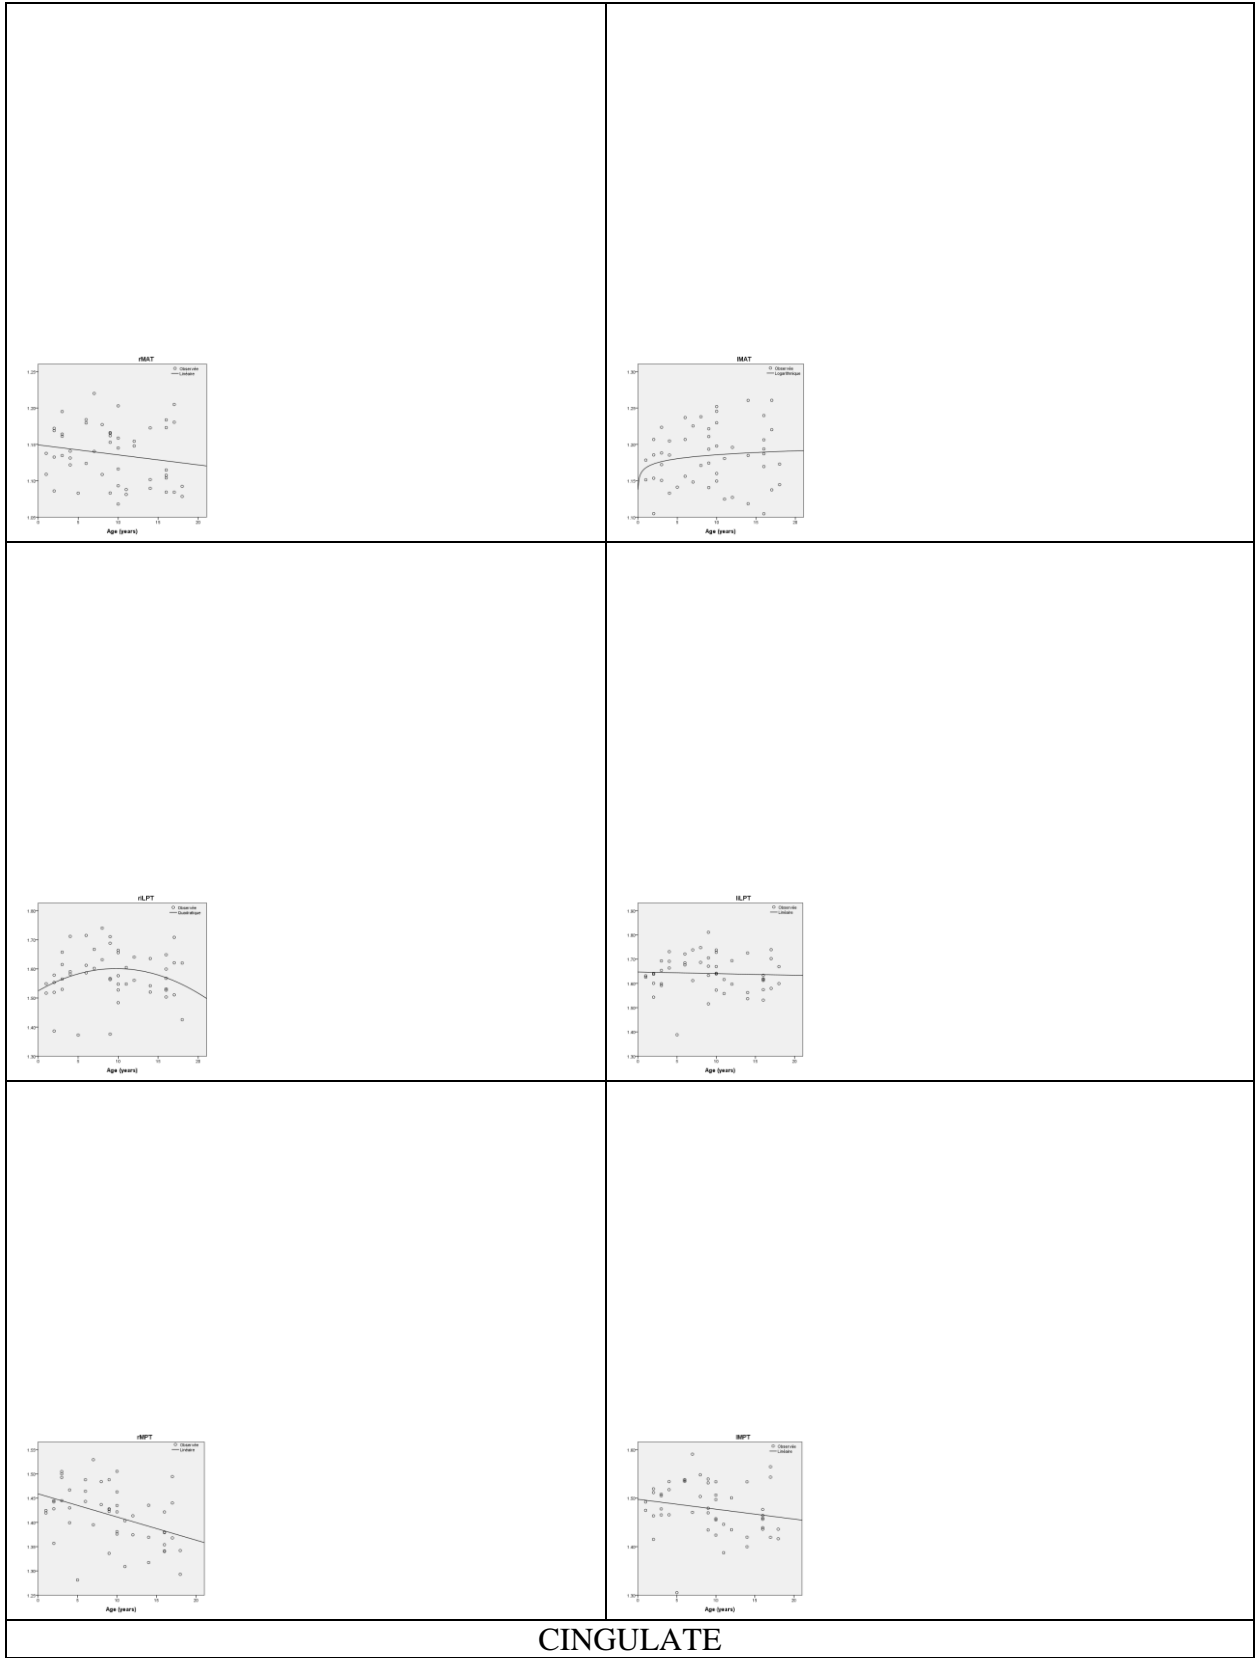

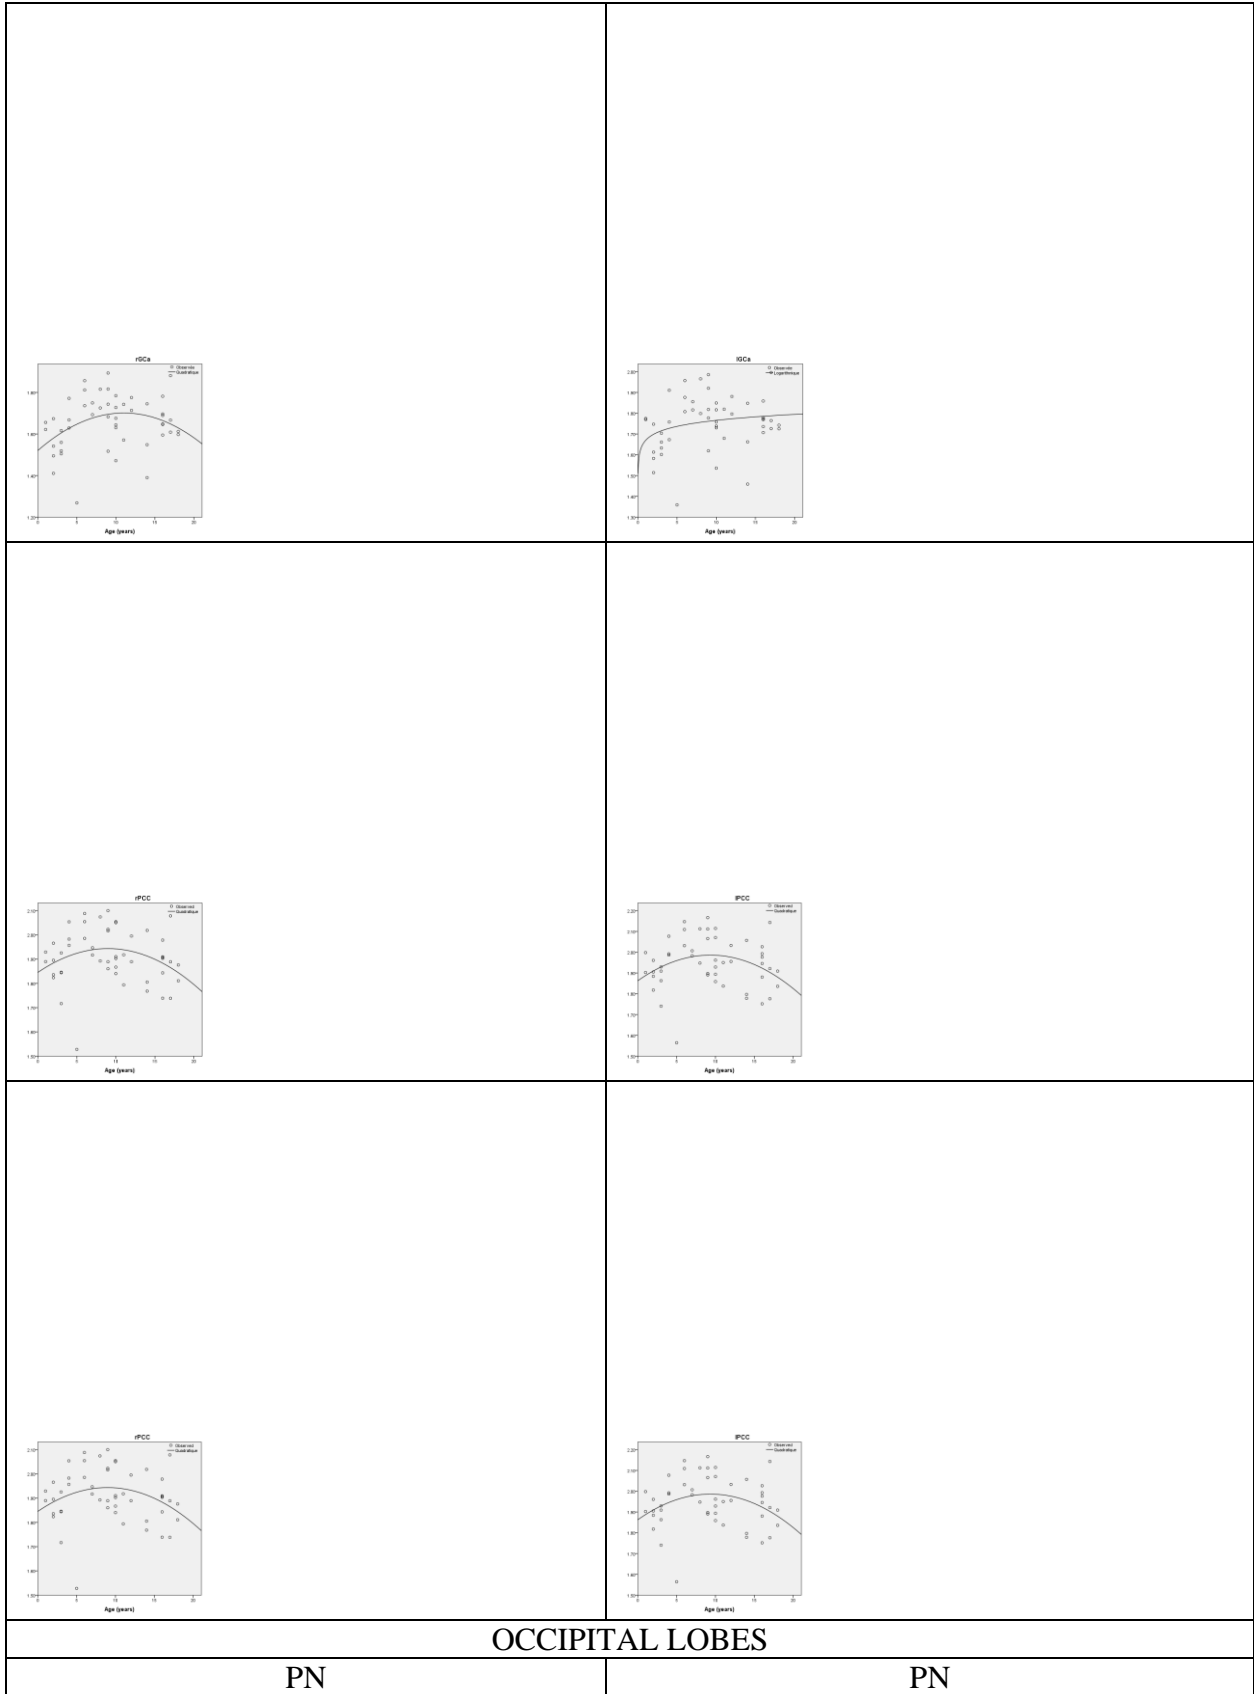

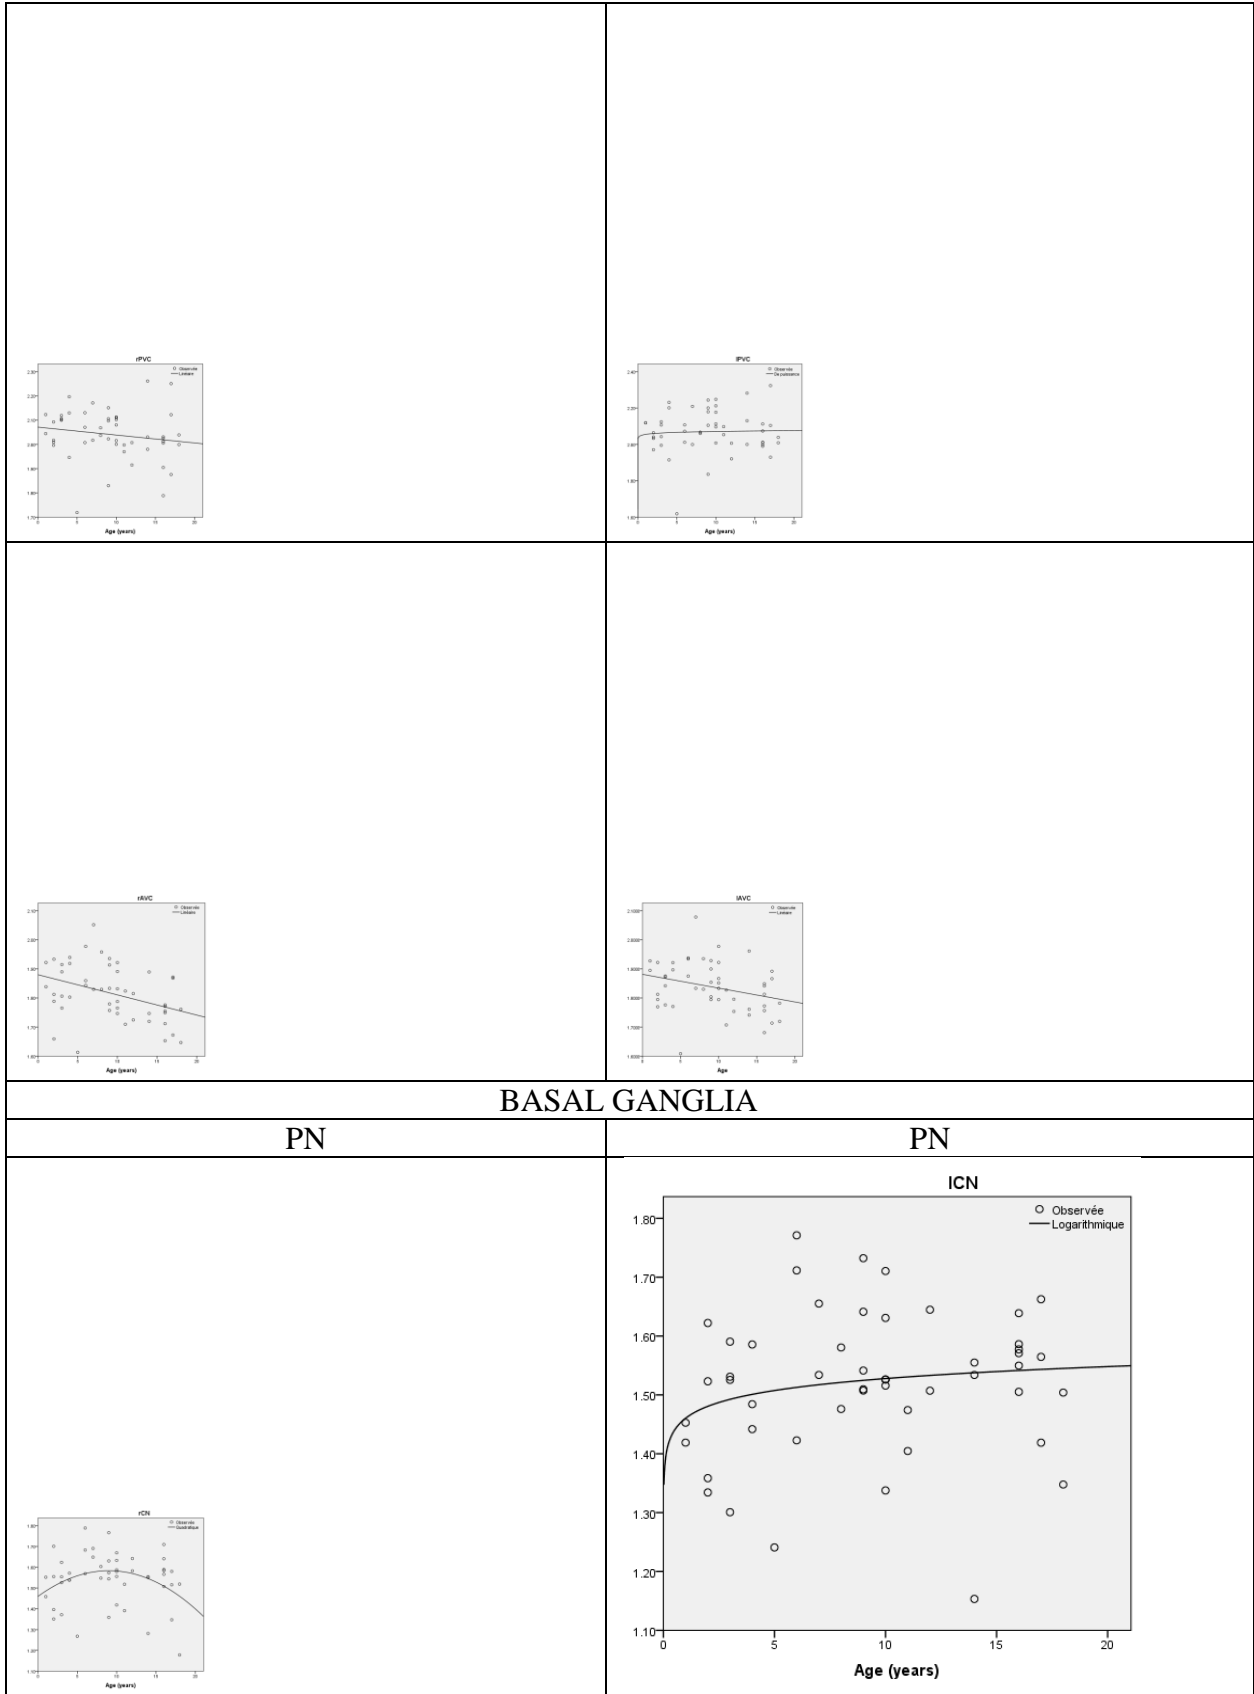

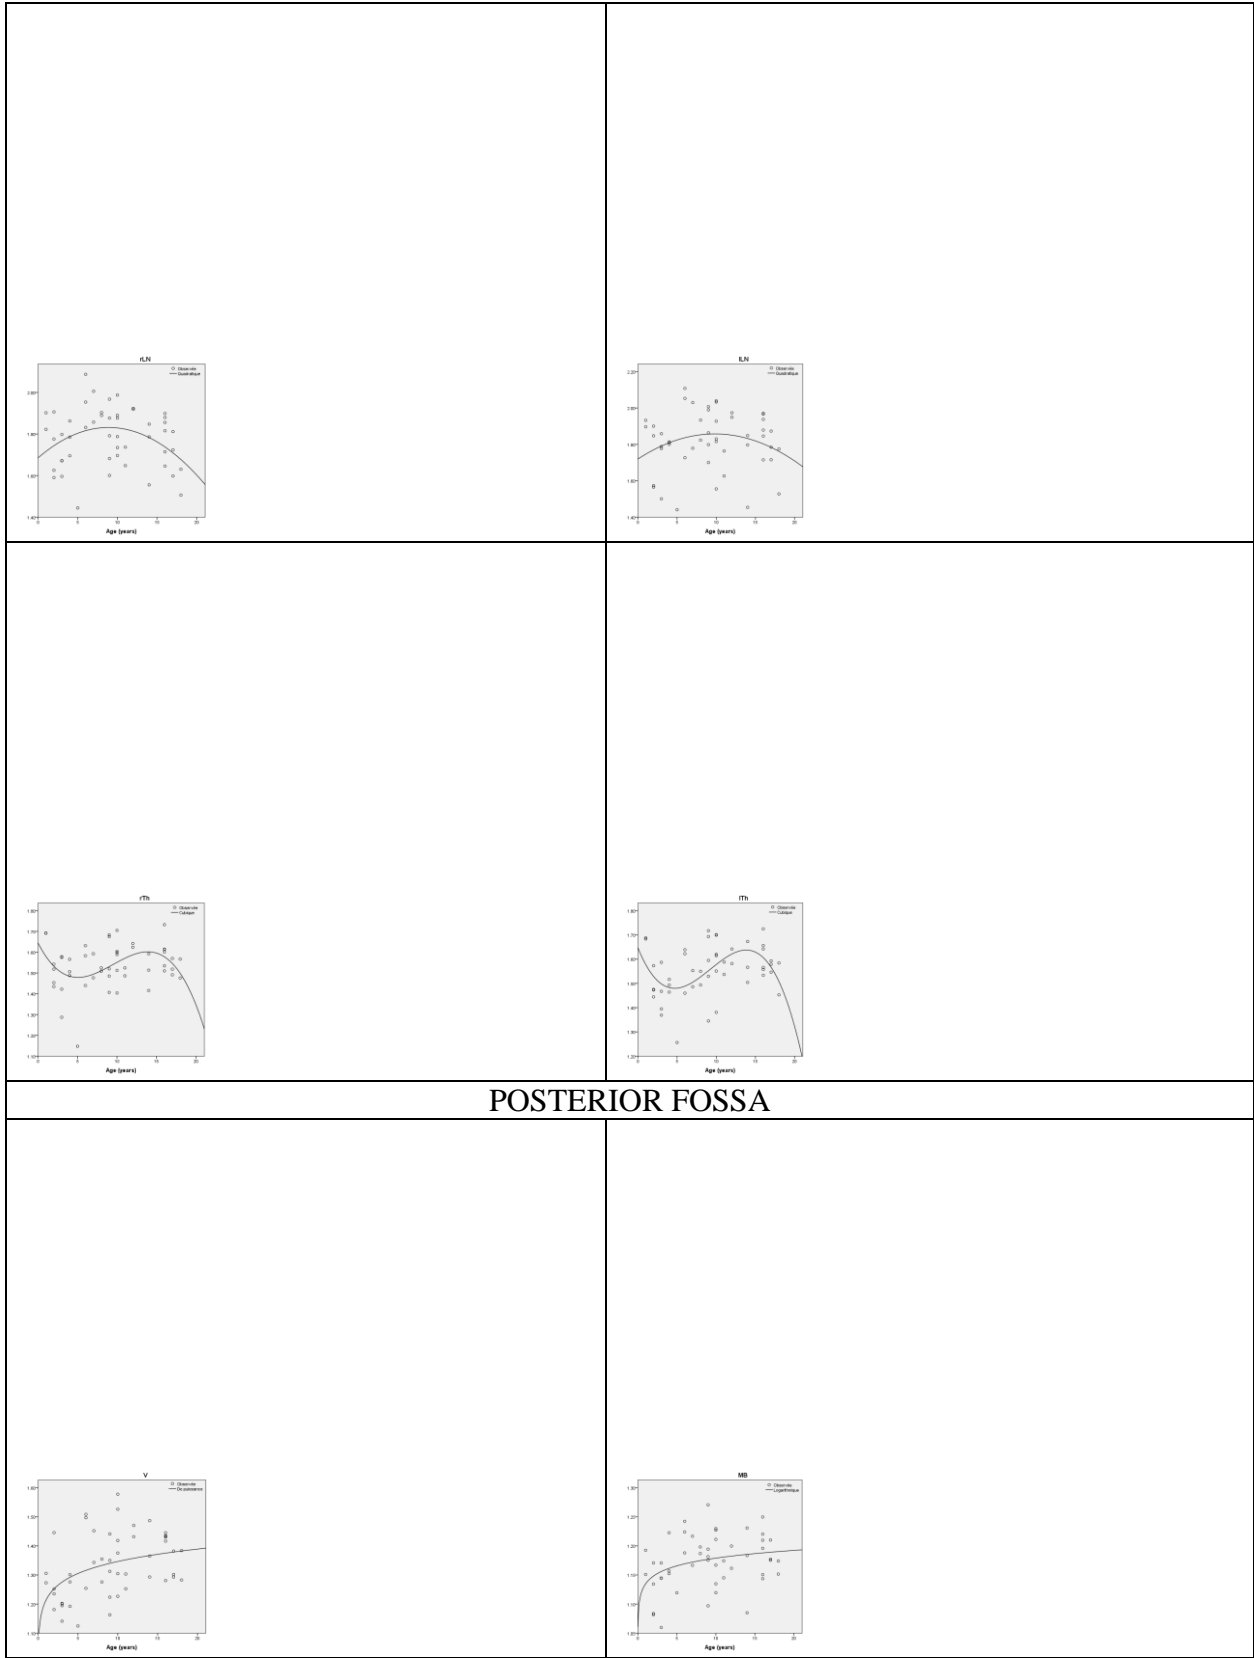

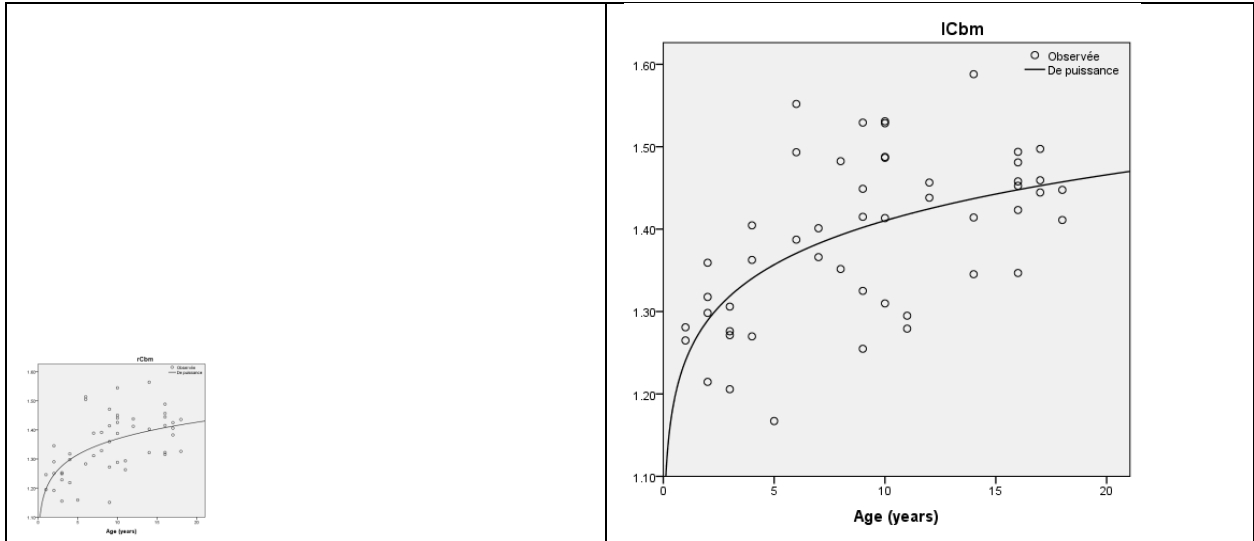

Supplement: 201889_Supplemental_Data.pdf [file 201889_Supplemental_Data.pdf]
